1 **Peroxiredoxin promotes longevity and H<sub>2</sub>O<sub>2</sub>-resistance in yeast through redox-**  
2 **modulation of protein kinase A**

3

4

5 Friederike Roger<sup>1</sup>, Cecilia Picazo<sup>2</sup>, Wolfgang Reiter<sup>3</sup>, Marouane Libiad<sup>4</sup>, Chikako Asami<sup>1</sup>, Sarah  
6 Hanzén<sup>1</sup>, Chunxia Gao<sup>1</sup>, Gilles Lagniel<sup>4</sup>, Niek Welkenhuysen<sup>5</sup>, Jean Labarre<sup>4</sup>, Thomas Nyström<sup>6</sup>,  
7 Morten Grøtli<sup>1</sup>, Markus Hartl<sup>3</sup>, Michel B. Toledano<sup>4</sup> and Mikael Molin\*<sup>1,2</sup>

8

9 <sup>1</sup>Department of Chemistry and Molecular Biology, University of Gothenburg, SWEDEN

10 <sup>2</sup>Department of Biology and Biological Engineering, Chalmers University of Technology, Gothenburg,  
11 SWEDEN

12 <sup>3</sup>Mass Spectrometry Facility, Department of Biochemistry, Max F. Perutz Laboratories, University of  
13 Vienna, Vienna BioCenter, Vienna, AUSTRIA

14 <sup>4</sup>Oxidative Stress and Cancer Laboratory, Integrative Biology and Molecular Genetics Unit (SBIGEM),  
15 CEA Saclay, FRANCE

16 <sup>5</sup>Department of Mathematical Sciences, Chalmers University of Technology and University of  
17 Gothenburg, SWEDEN

18 <sup>6</sup>Department of Microbiology and Immunology, Institute for Biomedicine, Sahlgrenska Academy,  
19 University of Gothenburg

20

21 \*Correspondence: [mikael.molin@chalmers.se](mailto:mikael.molin@chalmers.se)

22

23

24

25

26

27

28

29

30

31 **Keywords**

32 Aging, peroxiredoxin, H<sub>2</sub>O<sub>2</sub> signaling, protein kinase A, glutathionylation, hormesis

1 **Abstract**

2 Peroxiredoxins are H<sub>2</sub>O<sub>2</sub> scavenging enzymes that also carry H<sub>2</sub>O<sub>2</sub> signaling and chaperone functions.  
3 In yeast, the major cytosolic peroxiredoxin, Tsa1 is required for both promoting resistance to H<sub>2</sub>O<sub>2</sub> and  
4 extending lifespan upon caloric restriction. We show here that Tsa1 effects both these functions not by  
5 scavenging H<sub>2</sub>O<sub>2</sub>, but by repressing the nutrient signaling Ras-cAMP-PKA pathway at the level of the  
6 protein kinase A (PKA) enzyme. Tsa1 stimulates sulfenylation of cysteines in the PKA catalytic subunit  
7 by H<sub>2</sub>O<sub>2</sub> and a significant proportion of the catalytic subunits are glutathionylated on two cysteine  
8 residues. Redox modification of the conserved Cys243 inhibits the phosphorylation of a conserved  
9 Thr241 in the kinase activation loop and enzyme activity, and preventing Thr241 phosphorylation can  
10 overcome the H<sub>2</sub>O<sub>2</sub> sensitivity of Tsa1-deficient cells. Results support a model of aging where nutrient  
11 signaling pathways constitute hubs integrating information from multiple aging-related conduits,  
12 including a peroxiredoxin-dependent response to H<sub>2</sub>O<sub>2</sub>.

13

## 1 Introduction

2 Caloric restriction (CR) is an intervention that slows down aging and reduces the incidence of age-  
3 related disease from the unicellular baker's yeast (Lin, Defossez, & Guarente, 2000) to rhesus monkeys  
4 (Mattison et al., 2017). CR-induced reduced nutrient signaling via insulin/insulin-like growth factor  
5 (IGF-1), the target-of-rapamycin and/or protein kinase A pathways is intimately linked to lifespan  
6 extension (L. Fontana, Partridge, L., and Longo, V.D., 2010; Kenyon, 2010; Molin & Demir, 2014;  
7 Nystrom, Yang, & Molin, 2012). Of other things, reduced nutrient signaling mitigates age-related  
8 oxidative damage by increasing oxidative stress resistance in organisms from yeast to humans (Fontan-  
9 Lozano, Lopez-Lluch, Delgado-Garcia, Navas, & Carrion, 2008; Heilbronn et al., 2006; Molin et al.,  
10 2011; Schulz et al., 2007; Sohal & Forster, 2014). Increased oxidative stress resistance appears as a  
11 common denominator of mechanisms by which nutrient signaling pathways dictate the anti-aging effects  
12 of CR and its health benefits (Alic & Partridge, 2011; L. Fontana, Partridge, & Longo, 2010; Longo,  
13 Shadel, Kaeberlein, & Kennedy, 2012). Still very few specific targets of nutrient signaling that explain  
14 the beneficial effects of CR have been identified (L. Fontana et al., 2010).

15 Peroxiredoxins might constitute one such target, as this major family of peroxide-negating enzymes is  
16 required for lifespan promotion by CR and CR-mimetics (De Haes et al., 2014; Molin et al., 2011;  
17 Olahova & Veal, 2015). In worms, the CR-mimetic drug metformin extends lifespan in a manner  
18 dependent on the activity of Prdx-2 (De Haes et al., 2014), and in flies, neuronal peroxiredoxin  
19 overexpression extends lifespan in the absence of caloric restriction (Lee et al., 2009). In addition, CR  
20 increases both yeast H<sub>2</sub>O<sub>2</sub> tolerance and lifespan by stimulating the activity of the major 2-Cys  
21 peroxiredoxin, Tsa1 (Molin et al., 2011), and the mild overexpression of Tsa1 potently extends lifespan  
22 [by 40% (Hanzen et al., 2016)]. As peroxiredoxins have been described as major peroxide scavenging  
23 enzymes, they may reduce the rate of aging by scavenging H<sub>2</sub>O<sub>2</sub>, which may also explain their  
24 requirement for the maintenance of genome stability (Molin & Demir, 2014; Nystrom et al., 2012) and  
25 the premature accumulation of age-related tumors in PrxI-deficient mice (Neumann et al., 2003).  
26 However, mild Tsa1 overexpression, although increasing lifespan, did not alter the rate at which  
27 mutations accumulate during aging (Hanzen et al., 2016). Furthermore, CR reduced the increased  
28 mutation rate in Tsa1-deficient cells by 50% (Hanzen et al., 2016) without extending their life-span  
29 (Molin et al., 2011). We instead proposed that Tsa1 counteracts age-related protein damage by guiding  
30 Hsp70/104 molecular chaperones to proteins aggregating upon increased age and H<sub>2</sub>O<sub>2</sub> (Hanzen et al.,  
31 2016).

32 Prx are obligate dimers carrying two catalytic residues, the peroxidatic Cys (C<sub>P</sub>, Cys48 in Tsa1) and the  
33 resolving Cys (C<sub>R</sub>, Cys171 in Tsa1). C<sub>P</sub> reduces H<sub>2</sub>O<sub>2</sub> and forms a sulfenic acid (-SOH), which  
34 condenses with the C<sub>R</sub> of the second Prx molecule into an inter-subunit disulfide, then reduced by  
35 thioredoxin. Once formed, the C<sub>P</sub>-SOH can also react with another H<sub>2</sub>O<sub>2</sub> molecule, which leads to  
36 formation of a sulfinic acid (-SO<sub>2</sub>H), instead of condensing into a disulfide. Sulfinylation inactivates the  
37 catalytic cycle, switching the enzyme function into a molecular chaperone by multimerisation (Hanzen  
38 et al., 2016; Jang et al., 2004; Noichri et al., 2015). Prxs can also signal H<sub>2</sub>O<sub>2</sub> by transfer of the oxidant  
39 signal to target proteins (Leichert & Dick, 2015; Stocker, Van Laer, Mijuskovic, & Dick, 2017).

40 We recently showed that, in response to H<sub>2</sub>O<sub>2</sub>, Tsa1 and thioredoxin are required for the activation of  
41 the transcription factor Msn2, as it inhibits PKA-mediated Msn2 repression (Bodvard et al., 2017). Here  
42 we explored whether the modulation of PKA by Tsa1 had any relevance in its role in slowing down  
43 aging and in H<sub>2</sub>O<sub>2</sub> resistance. We show that both the premature aging and H<sub>2</sub>O<sub>2</sub> sensitivity of cells  
44 lacking Tsa1 is due to aberrant protein kinase A (PKA) activation, and not to defective H<sub>2</sub>O<sub>2</sub> scavenging  
45 *per se*. Similarly, a single extra copy of the *TSA1* gene extended life-span by mildly reducing PKA

1 activity, without affecting H<sub>2</sub>O<sub>2</sub> scavenging. Tsa1 interacts with PKA at the level of its catalytic subunits.  
2 We identified a conserved Cys residue in the PKA catalytic subunit Tpk1 that is specifically required  
3 for Tsa1-mediated H<sub>2</sub>O<sub>2</sub> resistance. Tsa1-dependent oxidation of the catalytic subunit reduced enzyme  
4 activity and increased H<sub>2</sub>O<sub>2</sub> resistance in part through dephosphorylating a conserved threonine  
5 (Thr241) in the kinase activation loop. These results indicate that peroxiredoxins slow down the rate of  
6 aging through a unique role in kinase signaling, in addition to promote proteostasis. They also suggest  
7 a novel mode of regulation of the conserved nutrient-sensing cascade PKA that bypasses conventional  
8 signaling via the second messenger cAMP, and impinges on both H<sub>2</sub>O<sub>2</sub> resistance and aging.

9

## 1 Results

### 2 **The effects of Tsa1 on longevity are mediated by the Ras-cAMP-PKA pathway**

3 A single extra-copy of the *TSA1* gene, which encodes the major yeast cytosolic Prx, Tsa1, prolongs  
 4 lifespan in the absence of caloric restriction (Hanzen et al., 2016). To clarify the mechanism by which  
 5 Tsa1 promotes this effect, we enquired whether PKA is involved, as this kinase antagonizes both  
 6 longevity (Lin et al., 2000) and resistance to H<sub>2</sub>O<sub>2</sub> (Molin et al., 2011) and Tsa1 is required for  
 7 decreasing PKA-dependent phosphorylation of the ‘general stress’ transcription factor Msn2 in response  
 8 to H<sub>2</sub>O<sub>2</sub> (Bodvard et al., 2017). The high affinity cAMP-phosphodiesterase Pde2 degrades cAMP, and  
 9 deletion of *PDE2* promotes PKA activation by increasing cAMP levels, downstream of Ras2 [Figure  
 10 1A, (Broach, 2012; Deprez, Eskes, Wilms, Ludovico, & Winderickx, 2018; Santangelo, 2006)].  
 11 Deletion of *PDE2* decreased the lifespan of the wild type strain by 45% (Fig. 1B), as previously shown  
 12 (Lin et al., 2000), and also prevented the increased lifespan conferred by mild overexpression of *TSA1*  
 13 (compare *pde2Δ* and *pde2Δ o/e TSA1*), which indicates that PKA activity is dominant over Tsa1, and  
 14 suggests that Tsa1 might slow down aging by decreasing PKA activity. Indeed, mild *TSA1*  
 15 overexpression increased both the accumulation of the reserve carbohydrate glycogen (Figure 1C), a

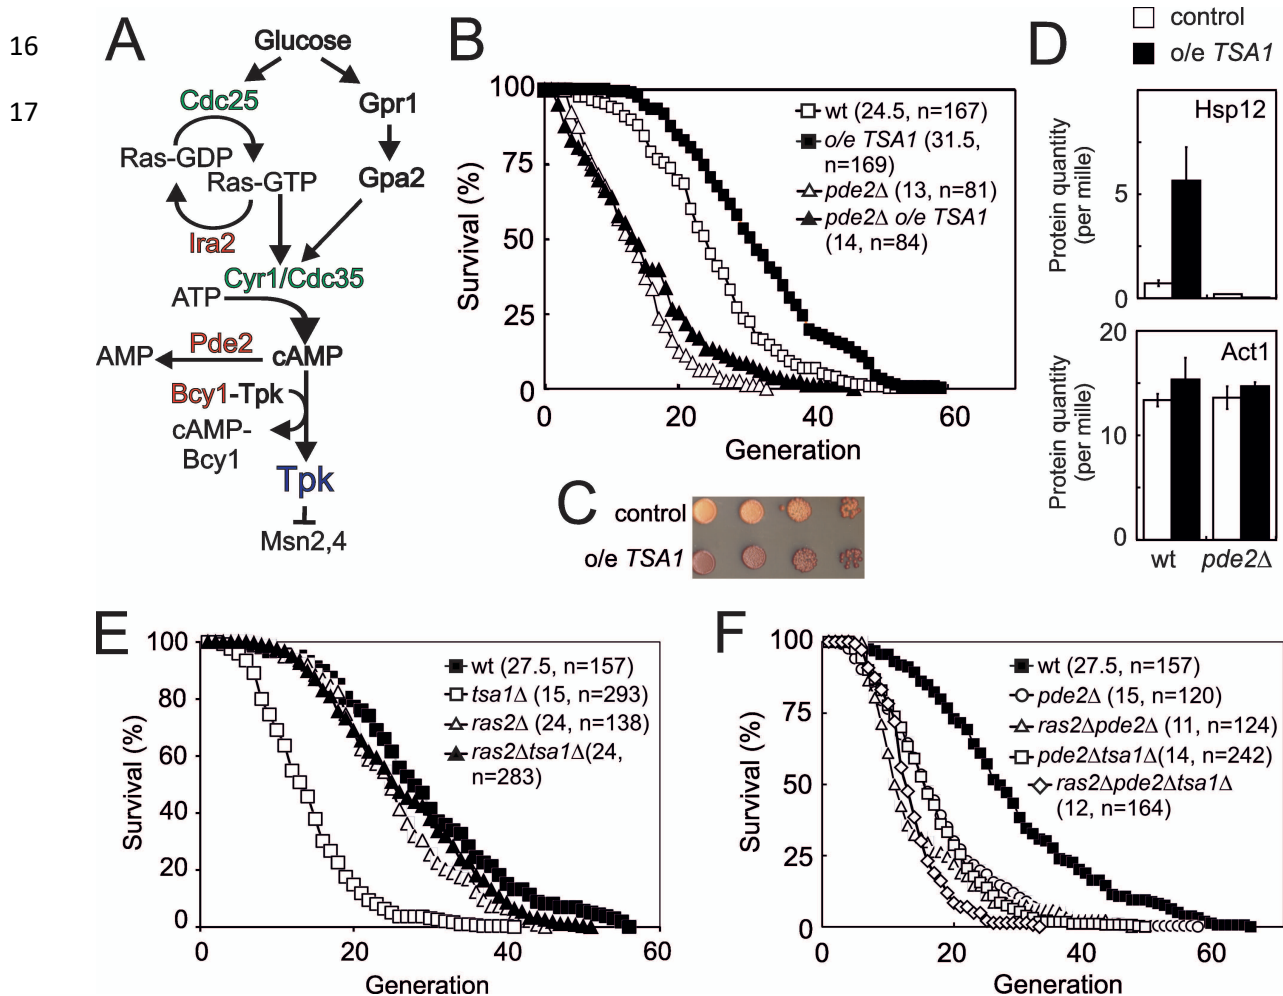

**Figure 1.** The 2-cys peroxiredoxin Tsa1 slows down aging via inhibiting protein kinase A signaling. **A)** Overview of the Ras-cAMP-PKA signaling pathway. In green stimulatory components and in red inhibitory. **B)** Lifespans of cells expressing an extra copy of the *TSA1* gene or not (vector control) in combination with the deletion of *PDE2* to induce high PKA signaling (*pde2Δ*). **C)** Accumulation of glycogen in vector control cells or cells expressing an extra copy of the *TSA1* gene as assayed by iodine vapor. **D)** Expression of Hsp12 in the indicated mutant strains (n=3). **E-F)** Lifespan of cells lacking Tsa1, Ras2, Pde2 or combinations thereof.

1 diagnostic feature of low PKA activity, and the expression of the PKA-repressed Msn2/4 target Hsp12  
2 (Figure 1D).

3 We turned to cells lacking *TSAL*, which suffer a severely shortened lifespan (Molin et al., 2011), asking  
4 whether this phenotype is linked to PKA. We combined the deletion of *TSAL* and *RAS2*, the latter largely  
5 abrogating the stimulation of PKA by glucose [Figure 1A, (Santangelo, 2006)]. Strikingly, Ras2  
6 deficiency completely rescued the reduced lifespan (Figure 1E) of cells lacking Tsa1, and upon deletion  
7 of *PDE2* in these cells (*ras2Δtsa1Δpde2Δ*), this rescue was no longer visible (Figure 1F). These data  
8 indicate that the shortened lifespan of *tsa1Δ* is due to aberrant activation of the Ras-PKA pathway, and  
9 as a corollary, that Tsa1 might inhibit this pathway. That Tsa1 deletion did not further reduce the lifespan  
10 of Pde2-deficient cells (Figure 1F), further support the notion that Tsa1 influences longevity by  
11 repressing the Ras-PKA pathway.

### 12 **Tsa1 represses the Ras-cAMP-PKA pathway at the level of the PKA enzyme**

13 Cells lacking Ras2 grew significantly slower than the wild-type (Figure 2A), consistent with a  
14 substantial reduction in PKA activity. However, deleting *TSAL* in these cells (*ras2Δtsa1Δ*) rescued its  
15 slow growth to a rate indistinguishable from that of *tsa1Δ* (Figure 2A), again pointing to an antagonistic  
16 effect of Tsa1 on the Ras-PKA pathway, also suggesting that Tsa1 affects the pathway downstream of  
17 Ras2. Similarly, overexpressing Ira2, a Ras-GTPase activating protein (RasGAP) that decreases PKA  
18 activation by switching RAS-GTP to its inactive GDP form, both slowed down growth to approximately  
19 half the rate of control cells (Figure 2C) and increased expression of Msn2/4-target genes that are under  
20 PKA repression (Figure 2D). Deleting *TSAL* in this strain restored both phenotypes (Figure 2B-D),  
21 similar to the effect of Ras-overactivation (*RAS2G19V* allele, Figure 2 – figure supplement 1A-B) or  
22 Pde2 deficiency (Figure 2C). Importantly, rescue of the slow growth of Ira2-overproducing cells by  
23 Tsa1 deletion was lost when *PDE2* was also overexpressed in these cells, also indicating that the rescue  
24 is due to increased PKA activity (Figure 2E).

25 Strains lacking both *RAS* alleles (*ras1Δras2Δ*) are not viable due to inactivation of PKA. This inability  
26 to germinate can be rescued by genetic interventions that restore PKA activity downstream of Ras, i.e.  
27 the inactivation of Pde2 or of the PKA negative regulatory subunit Bcy1 (Garrett & Broach, 1989; Toda  
28 et al., 1985; Wilson & Tatchell, 1988), or of Yak1, which acts downstream of PKA. Loss of the PKA-  
29 repressed ‘general stress’ transcription factor Msn2 alone or of both Msn2 and its homologue Msn4, can  
30 also partially overcome the growth impairment of the partial loss of active Ras (Figure 2C) and the  
31 requirement for a PKA catalytic subunit-encoding (*TPK*)-gene for viability (Smith, Ward, & Garrett,  
32 1998). As the above data indicate that Tsa1 represses PKA activity, we tested whether its loss could  
33 similarly rescue the inability of *ras1Δras2Δ* to germinate by sporulating heterozygous *ras1Δ/RAS1*,  
34 *ras2Δ/RAS2* and *tsa1Δ/TSAL* diploid cells. However, no cells lacking both Ras1 and Ras2 were viable  
35 irrespective of the presence or absence of Tsa1 (Figure 2F). Similarly, we did not obtain viable  
36 *tsa1Δtpk1Δtpk2Δtpk3Δ* spores in a cross between haploid *tsa1Δ* and *tpk1Δtpk2Δtpk3Δ* strains unless  
37 a centromeric *TPK1* plasmid was also present (in 6 out of 6 viable spores with the genomic  
38 *tsa1Δtpk1Δtpk2Δtpk3Δ* genotype (Figure 2 - figure supplement 1C). These data suggest that the  
39 repression exerted by Tsa1 on the Ras-PKA pathway requires the presence of PKA, and thus that the  
40 latter may be the target of repression.

41  
42 To further ascertain at which level Tsa1 interferes with Ras-cAMP-PKA activity, we overproduced the  
43 PKA negative regulatory subunit (*mc-BCY1*), which by inactivating PKA releases repression of Msn2,  
44 and dramatically increases the latter’s response to H<sub>2</sub>O<sub>2</sub> (Bodvard et al., 2017) (Figure 2G). However,

1 *mc-BCY1* had no effect in *Tsa1*-deficient cells (Figure 2G), suggesting that *Tsa1* inhibits the Ras-cAMP-  
 2 PKA pathway at the level of the PKA enzyme. We also measured the levels of the pathway signaling  
 3 intermediates, Ras-GTP and cAMP, in cells overproducing *Ira2* in the presence and absence of *Tsa1*. As  
 4 expected, overexpression of *IRA2* dramatically reduced the levels of active Ras (Ras-GTP) and this  
 5 reduction was largely maintained in *pde2Δ* cells (Figure 2H), in which PKA signaling is increased  
 6 downstream of Ras. Similarly, *Tsa1*-deficient cells overproducing *Ira2* exhibited very low Ras-GTP

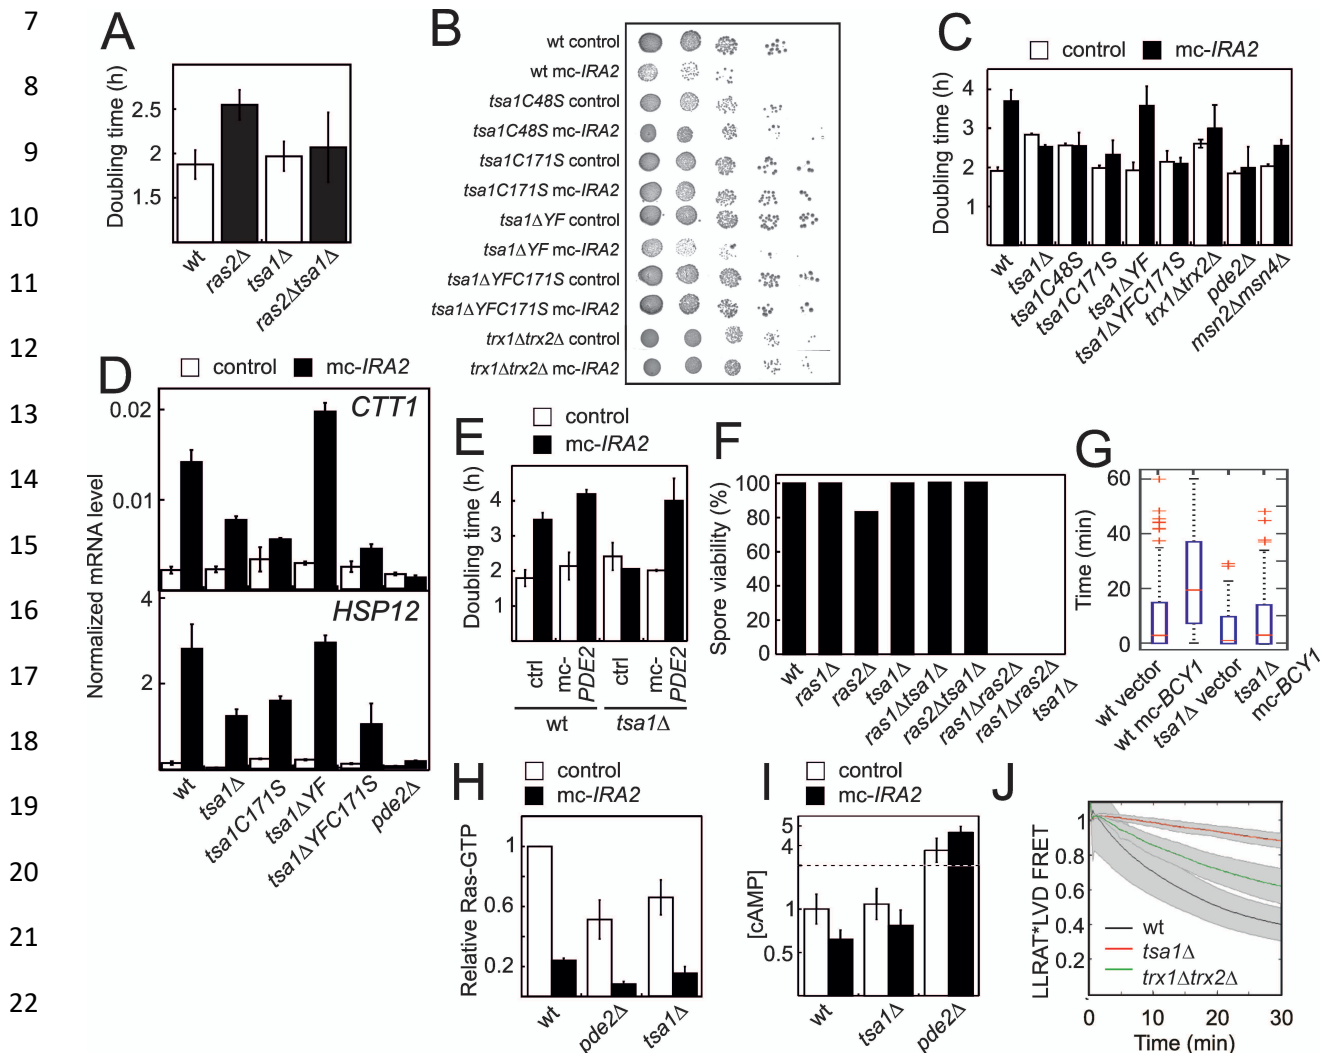

23 **Figure 2.** The *Tsa1* catalytic cysteines affect protein kinase A dependent proliferation downstream  
 24 of cAMP but not downstream of the catalytic subunits. **A)** Growth of cells lacking *Ras2*, *Tsa1* or both  
 25 ( $n=3$ , error bars indicate SD). **B-C)** Growth of cells overexpressing *IRA2* in the indicated mutants of  
 26 the *Tsa1* catalytic cycle or the PKA signaling pathway on solid (**B**) or in liquid medium (**C**,  $n=3-15$ ).  
 27 **D)** Expression of the PKA repressed *CTT1* or *HSP12* genes in the indicated mutants in the *Tsa1*  
 28 catalytic cycle overexpressing *IRA2* (*mc-IRA2*) or not (instead expressing the vector, control,  
 29  $n=3\pm SD$ ) sampled during mid-exponential growth. **E)** Growth of *Tsa1*-proficient or deficient (*tsa1Δ*)  
 30 cells overexpressing *IRA2* (*mc-IRA2*) or *PDE2* (*mc-PDE2*), both or the corresponding vector control  
 31 plasmids (control) in liquid medium ( $n=3\pm SD$ ). **F)** Spore germination in cells deficient in *Ras1*, *Ras2*,  
*Tsa1* or combinations thereof. Spore germination was estimated in 32 tetrads where genotypes  
 could be assigned to all spores (128 in total, 8-23 spores per genotype). **G)** Total time of nuclear  
*Msn2* localization in the indicated mutant strains for 60 min following the addition of 0.3 mM  $H_2O_2$   
 ( $n=46-82$ ). **H-I)** Ras-GTP (**H**) or cAMP (**I**) levels in the wild-type or the indicated mutant strains  
 overexpressing *IRA2* (*mc-IRA2*) or not (expressing the vector control, control,  $n=3$ ). **J.**  
 Phosphorylation of the ectopic AKAR4 PKA site upon  $H_2O_2$  addition (0.4 mM) in wt, *tsa1Δ* and  
*trx1Δtrx2Δ* cells. ( $n=85, 71$  & 32, respectively). Error bars indicate SD.

1 levels (Figure 2H). In addition, cAMP levels were not affected in Tsa1-deficient cells (Figure 2I).  
2 Altogether, these data indicate that repression of the Ras-cAMP-PKA pathway by Tsa1 is needed both  
3 during aging and normal growth, and that this repressive effect is exerted at the level of PKA. Lastly, to  
4 directly monitor the impact of Tsa1 on PKA activity, we used a PKA sensor in which the  
5 phosphorylation state of the ectopic PKA site LLRAT\*-LVD in the mammalian FHA1 phospho-amino  
6 acid domain is evaluated via FRET (Molin et al., 2020). PKA repression upon H<sub>2</sub>O<sub>2</sub> addition was readily  
7 visible in wild-type cells using this sensor, whereas cells lacking Tsa1 hardly repressed PKA at all  
8 (Figure 2J).

9 Altogether, these data indicate that repression of the Ras-cAMP-PKA pathway by Tsa1 is exerted at the  
10 level of PKA, and occurs during aging, in the cell response to H<sub>2</sub>O<sub>2</sub> and during normal growth.

### 11 **Tsa1 catalytic cysteines control H<sub>2</sub>O<sub>2</sub> resistance by repressing PKA**

12 Prxs can function as H<sub>2</sub>O<sub>2</sub> scavengers, as receptors of H<sub>2</sub>O<sub>2</sub> signaling relays, or as chaperones. The first  
13 two functions require Prx-two catalytic Cys residues C<sub>P</sub> and C<sub>R</sub> and electrons from thioredoxin, whereas  
14 the third one only relies on the sulfinylation of C<sub>P</sub>. To sort out which of these three Prx biochemical  
15 functions is involved in PKA repression, we examined the effect of mutating C<sub>P</sub> and C<sub>R</sub> or of preventing  
16 enzyme sulfinylation on Tsa1-mediated repression. The lifespans of *tsa1C48S* and *tsa1C171S* mutants  
17 suffered a lifespan as short as cells lacking Tsa1 (Figure 3A). Similarly, both the slow growth and the  
18 constitutive expression of the PKA-repressed genes *CTT1* and *HSP12* resulting from *Ira2*  
19 overproduction were lost in the *tsa1C48S* and *tsa1C171S* mutants (Figure 2B-D). In contrast, cells  
20 expressing a truncated form of Tsa1 lacking the C-terminal YF motif (*tsa1ΔYF*), an enzyme form almost  
21 totally resilient to sulfinylation (Hanzen et al., 2016), were indistinguishable from wild-type with regards  
22 to their lifespan (Figure 3A), slow growth and *Ira2* overexpression-dependent, constitutive *Msn2*-target  
23 expression (Figure 2B-D), thus excluding an involvement of the Tsa1 chaperone function in PKA  
24 repression.

25 Next, to differentiate between the scavenging and signaling functions of Tsa1, we first probed the H<sub>2</sub>O<sub>2</sub>  
26 sensitivity phenotype of cells lacking Tsa1. The *tsa1Δ* was sensitive to H<sub>2</sub>O<sub>2</sub>, as monitored by growth  
27 on plates containing H<sub>2</sub>O<sub>2</sub>, and strikingly, deletion of *RAS2* or the overproduction of *Ira2* totally rescued  
28 this phenotype (Figure 3B-C). Deletion of *PDE2* in these cells  
29 (*ras2Δtsa1Δpde2Δ* or *tsa1Δpde2Δ mc-IRA2*) restored the H<sub>2</sub>O<sub>2</sub> sensitivity of *tsa1Δ* (Figure 3, figure  
30 supplement 1A), further indicating that the *tsa1Δ* H<sub>2</sub>O<sub>2</sub> phenotype is linked to overactive PKA, and not  
31 to the loss of Tsa1 scavenging function. Similarly, mild overexpression of *TSAL* conferred an increased  
32 tolerance to H<sub>2</sub>O<sub>2</sub>, which was lost upon deletion of *PDE2* (Figure 3D). As another indication of Tsa1  
33 scavenging function dispensability, the decay rate of H<sub>2</sub>O<sub>2</sub> in the medium of *tsa1Δ* cells after adding a  
34 bolus dose was similar to the rate observed in a wild-type cell suspension (Figure 3F). In addition, H<sub>2</sub>O<sub>2</sub>  
35 levels measured using the genetically encoded H<sub>2</sub>O<sub>2</sub> sensor HyPer3 (Bilan et al., 2013) were modestly,  
36 but significantly increased in old wild-type (10-12 generations), relative to young cells (Figure 3G).  
37 Tsa1-deficient cells however, exhibited a similar or even lower increase in the H<sub>2</sub>O<sub>2</sub> fluorescence ratio  
38 with age, relative to wild-type, and in cells expressing an extra copy of the *TSAL* gene, H<sub>2</sub>O<sub>2</sub> increased  
39 to a similar or even higher levels in aged cells (Figure 3H).

40 We also examined the role of the thioredoxin pathway in PKA repression, which although required for  
41 both Tsa1 signaling and scavenging functions, should be more important for the latter. Deletion of *TRX1*  
42 and *TRX2* partly rescued the slow growth of *IRA2*-overexpressing cells (Figure 2B-C), and suppressed  
43 the increased constitutive expression of the PKA-repressed *Msn2/4* target genes resulting from *Ras2*  
44 deletion (Figure 2 – figure supplement 1D), the latter even more so than did the deletion of *TSAL*.



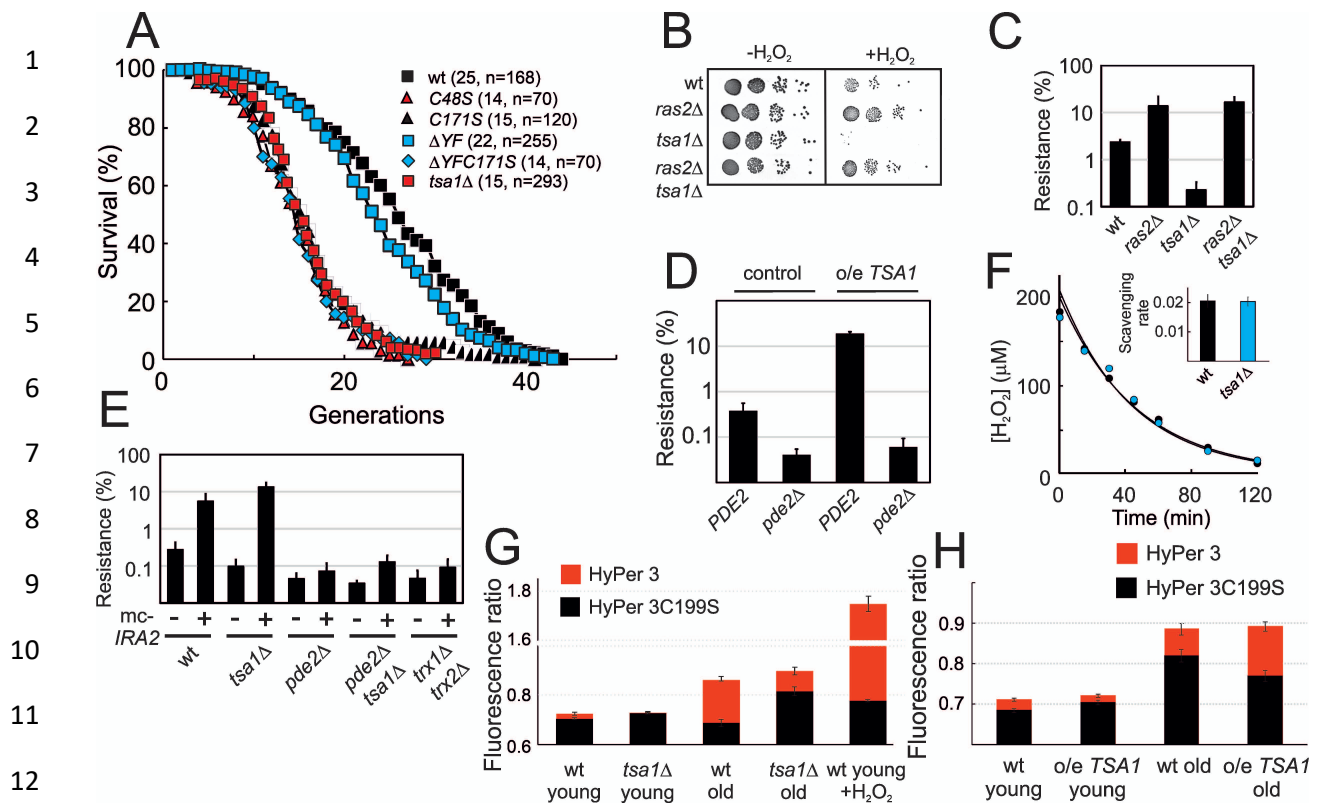

**Figure 3.** Tsa1 catalytic cysteines slow down aging and increase H<sub>2</sub>O<sub>2</sub>-resistance via inhibiting protein kinase A. **A.** Life spans of wild-type or the indicated genomic *tsa1* mutant strains. In brackets median life-spans and n. **B.** Spot-test assay of growth in the presence and absence of 1.5 mM H<sub>2</sub>O<sub>2</sub> in YPD plates. **C.** Quantification of H<sub>2</sub>O<sub>2</sub> resistance in **B** (n=3). **D.** H<sub>2</sub>O<sub>2</sub> resistance (1.5 mM H<sub>2</sub>O<sub>2</sub>, YPD medium) in the indicated mutants (n=3). **E.** H<sub>2</sub>O<sub>2</sub> resistance in cells overexpressing *IRA2* (mc-*IRA2* +) or vector control (-) 0.4 mM H<sub>2</sub>O<sub>2</sub>, SD medium (n=3). **F.** Culture medium H<sub>2</sub>O<sub>2</sub> removal assay of wt (black) and *tsa1Δ* cells (blue) to which 200 μM was added. Inset shows average scavenging rates for cultures upon the addition of 400 μM (n=3). Error bars indicate SD. **G.** Average HyPer3 (red) or HyPer3 C199S (black) fluorescence ratio (500 nm/420 nm) in young or aged wild-type or *tsa1Δ* cells +/- 400 μM H<sub>2</sub>O<sub>2</sub> for 10 min. Cells of about 10-12 generations of replicative age (aged) or young control cells (young) were assayed. Error bars indicate SEM (n=231, 170, 319, 236 & 202, respectively). **H.** Average HyPer3 (red) or HyPer3 C199S (black) fluorescence ratio (500 nm/420 nm) in young or aged wild-type (YMM130) and o/e *TSA1* cells as in **G**. Error bars indicate SEM (n=404, 579, 190 & 204, respectively).

21 However, although H<sub>2</sub>O<sub>2</sub> sensitive, this *trx1Δtrx2Δ* strain H<sub>2</sub>O<sub>2</sub> phenotype could neither be rescued by  
 22 deletion of *RAS2* (Figure 3 – figure supplement 1B) nor by the overproduction of *Ira2* (Figure 3E). In  
 23 addition, PKA was still moderately repressed in *trx1Δtrx2Δ* in response to H<sub>2</sub>O<sub>2</sub>, as measured with the  
 24 FRET PKA phosphorylation sensor (Figure 2J). Thioredoxins are thus only partially required to repress  
 25 the phosphorylation of an ectopic PKA target site upon H<sub>2</sub>O<sub>2</sub> addition, or may govern signaling through  
 26 another pathway that synergizes with PKA in some PKA output functions. Nevertheless, that the Tsa1  
 27 catalytic Cys residues are critical to restrain PKA activity, but not the thioredoxins further exclude the  
 28 Tsa1 scavenging function *per se*.

### 29 Tpk1 is sulfenylated upon H<sub>2</sub>O<sub>2</sub> addition and glutathionylated on the conserved Cys243

30 If indeed Tsa1 inhibits PKA, we asked by which mechanism this happens. We detected in myc-Tsa1  
 31 immunoprecipitates from unstressed cells a weak, but significant amount of Tpk1, the amount of which  
 32 increased dramatically following H<sub>2</sub>O<sub>2</sub> addition (0.4 mM, Figure 4A). Conversely, immunoprecipitating

1 Tpk1-HB brought down a significant amount of Tsa1 (Figure 4, figure supplement 1A). We next asked  
 2 whether PKA underwent thiol-redox modifications. Non-reducing electrophoresis did not identify any  
 3 migration changes compatible with the presence of a disulfide in neither of Tpk1 nor Bcy1 (Figure 4 -  
 4 figure supplement 1B-C). Similarly, kinetic-based trapping using *tsa1*- and *trx2*-resolving cysteine  
 5 mutants (*tsa1C171S* and *trx2C34S*) neither altered Bcy1 nor Tpk1 migration (Figure 4 - figure  
 6 supplement 1B-D). We thus performed a mass spectrometry (MS) analysis using affinity-purified His-  
 7 biotin-tagged Tpk1 (Tpk1-HB) (Tagwerker et al., 2006) (Supplementary file 2A). We selected a set of  
 8 peptides covering the most abundant Tpk1 PTMs of its two unique Cys residues, Cys195 and Cys243,  
 9 and performed a quantitative analysis by label free quantification of MS1 peaks, followed by a targeted  
 10 MS/MS approach by parallel reaction monitoring (PRM). A significant proportion of Cys195 was  
 11 present as an adduct with glutathione (GSH) in unstressed cells (Figure 4 – figure supplement 1E,  
 12 Supplementary file 2B), and levels of all three peptides bearing this modification decreased by 6 and  
 13 11-fold upon cell exposure to 0.4 mM and 0.8 mM H<sub>2</sub>O<sub>2</sub>, respectively (Figure 4 – figure supplement 1F,  
 14 Supplementary file 2C-2D). A significant fraction of Tpk1 Cys243 was also glutathionylated, even in  
 15 unstressed cells, and in this peptide, Thr241 was phosphorylated (Figure 4B- C, Figure 4 – figure  
 16 supplement 1G-H, Supplementary file 2B). We also detected variants of this peptide bearing other  
 17 cysteine modifications (i.e. methyl thiolation, sulfinylation and unknown modifications, Figure 4 –  
 18 figure supplement 1G). Importantly, Thr241 phosphorylation decreased upon exposure to H<sub>2</sub>O<sub>2</sub> (Figure  
 19 4C, Figure 4 – figure supplement 1G), as did Cys243 glutathionylation (2.5-fold), when it occurred on  
 20 the phosphorylated peptide (Figure 4C). However, the Cys243 glutathionylated Thr241 dephosphorylat-

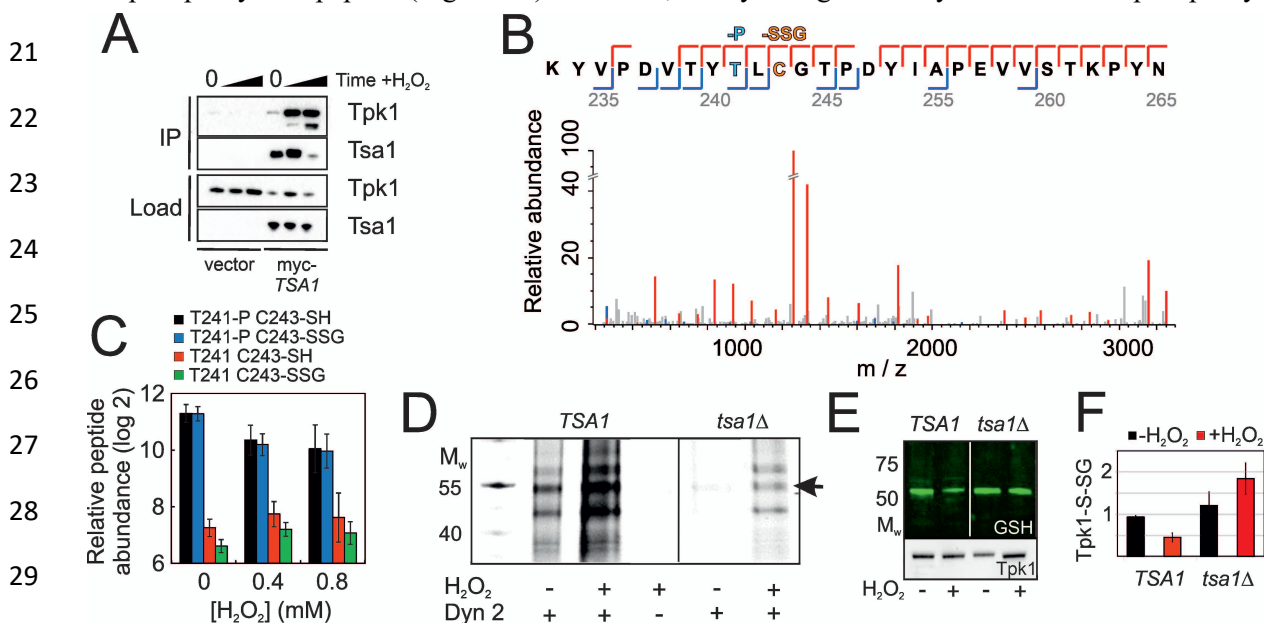

30 **Figure 4.** Tsa1 interacts with the PKA catalytic subunit Tpk1 and stimulates Tpk1 cysteine  
 31 sulfenylation by H<sub>2</sub>O<sub>2</sub>. Tpk1 is glutathionylated at a conserved cysteine. **A.** Tpk1 interacts with myc-  
 32 Tsa1 in a coimmunoprecipitation assay and in a manner strongly stimulated by H<sub>2</sub>O<sub>2</sub>. **B.** MS-MS  
 33 spectrum showing the matching b-ion (blue) and y-ion (red) series following fragmentation of the  
 34 Thr241 phosphorylated and C243 glutathionylated peptide encompassing amino acid residues  
 35 Y239-K261 in Tpk1. T-P = phospho-threonine, C-SSG = glutathionylated cysteine. **C.** PRM-based  
 36 quantification of the indicated Thr241 and Cys243 containing Y239-K261 peptides in Tpk1, in the  
 absence or presence of the indicated amount of H<sub>2</sub>O<sub>2</sub>, respectively (n=3). Error bars indicate SD. **D.**  
 DYn-2 assay showing Tpk1 cysteine sulfenylation in the presence and absence of TSA1 and +/- 0.5  
 mM H<sub>2</sub>O<sub>2</sub> for 5 min. Tpk1-HB was immunoprecipitated from *tpk2Δtpk3Δ* (TSA1) and  
*tpk2Δtpk3Δtsa1Δ* (*tsa1Δ*) cells and analyzed in gel for cyanine5 fluorescence. **E-F.** Glutathionylation  
 of Tpk1-HB in strains in **D** as assayed by anti-glutathione immunoblot of immunoprecipitated Tpk1-  
 HB in the absence of or 10 min following the addition of 0.4 mM H<sub>2</sub>O<sub>2</sub>. Extracts were separated  
 under non-reducing conditions (n=3).

1 ed peptide increased by 1.4 fold. Confirming MS results, Tpk1 was glutathionylated in unstressed cells,  
2 when monitored by anti-glutathione immunoblot of immunoprecipitated Tpk1-HB (Figure 4E-F), and  
3 this signal decreased upon exposure to H<sub>2</sub>O<sub>2</sub>. Further, in *tsa1Δ* cells, the glutathionylation signal was  
4 more intense, and did not decrease, but rather increased upon H<sub>2</sub>O<sub>2</sub> exposure. We also used DYn-2, a  
5 cell-permeable cysteine sulfenic acid (-SOH) probe amenable to click chemistry (Yang et al., 2015) as  
6 another approach to probe Tpk1 oxidative modifications. In wild-type unstressed cells, Tpk1 displayed  
7 a weak DYn-2 signal, the intensity of which significantly increased upon H<sub>2</sub>O<sub>2</sub> addition, whereas in  
8 *tsa1Δ* cells this signal was much less intense, both prior to and after exposure to H<sub>2</sub>O<sub>2</sub> (0.4 mM, Figure  
9 4D, Figure 4 – figure supplement 1I).

10 The two Tpk1 Cys residues thus undergo complex redox changes comprising glutathionylation and  
11 sulfenylation as dominant and biologically relevant modifications. These changes occur independently,  
12 the former present in unstressed cells, decreasing upon H<sub>2</sub>O<sub>2</sub> exposure, and the latter strongly induced  
13 by H<sub>2</sub>O<sub>2</sub>, both dependent upon Tsa1. The fact that the increased sulfenylation of Tpk1 upon H<sub>2</sub>O<sub>2</sub>  
14 addition correlates with Thr241 dephosphorylation led us to probe the importance of all three residues  
15 in Tpk1 function by Ala substitution. These substitutions altered neither protein levels not the cell ability  
16 to grow (Figure 5 – figure supplement 1A-D). Interestingly, *tpk1C243A*, but not *tpk1C195A* rendered  
17 cells hyper-sensitive to H<sub>2</sub>O<sub>2</sub> (Figure 5A, Figure 5 – figure supplement 1E), which was not improved by  
18 mild overexpression of *TSA1* (Figure 5B). In contrast, the *tpk1T241A* mutant significantly increased  
19 H<sub>2</sub>O<sub>2</sub> resistance both in wild-type (Figure 5A) and in *tsa1Δ* cells (Figure 5C). A docking experiment  
20 performed on a Tpk1 3D structural homology model based on the mouse enzyme structure (Figure 5D-  
21 E), showed that introducing a glutathione moiety at Cys243 stabilized Thr241 in the dephosphorylated  
22 state by direct hydrogen bonding (Figure 5F-H). When Thr241 was phosphorylated, the kinase  
23 activation loop was now stabilized through hydrogen bonds to Arg209 and Lys233 (Figure 5F-G), and  
24 in this setting, glutathione at Cys243 adopted a different position, now extending towards the ATP-  
25 binding pocket (Figure 5I). Substitution of Cys243 to the less bulky cysteine sulfenic/sulfinic acid  
26 mimetic aspartate (*tpk1C243D*), or modification by methylthiolation (S-CH<sub>3</sub>, Figure 4 – figure  
27 supplement 1E) had, however, little effect on the molecular dynamics of Tpk1 (Figure 5 – figure  
28 supplement 1F-G). In summary, Cys243 glutathionylation might inhibit PKA by interfering both with  
29 Thr241 phosphorylation and with the ATP-binding pocket dynamics, when occurring together with  
30 phosphorylated Thr241, which would not fit the observed decreased glutathionylation of Tpk1 seen  
31 upon H<sub>2</sub>O<sub>2</sub> addition. Alternatively, the Cys243 sulfenic acid may react further as previously speculated  
32 for the redox modulation of the ER kinase IRE-1 (Hourihan, Moronetti Mazzeo, Fernandez-Cardenas,  
33 & Blackwell, 2016) and our 3D data suggest that a more bulky modification may be the driving event  
34 in PKA repression. Taken together, these data support the presence of a Tsa1 thiol-based redox  
35 mechanism in PKA repression.

36

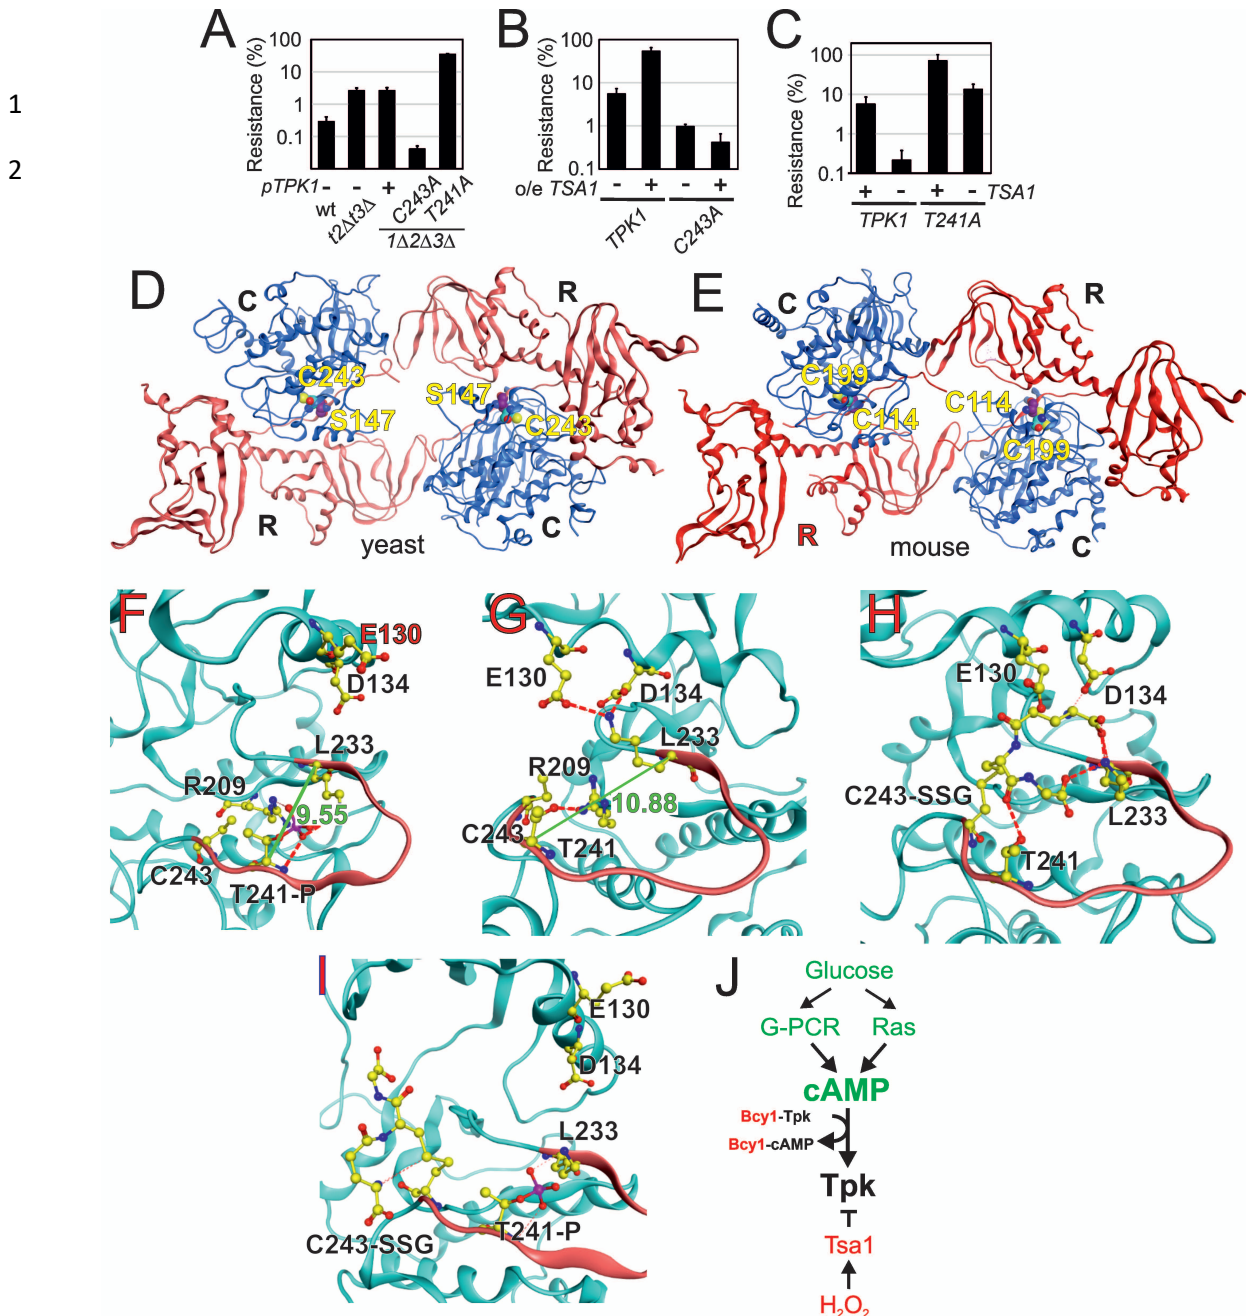

**Figure 5.** Tpk1 Cys243 redox-modification and Tsa1 inhibits PKA activity by dephosphorylating and destabilizing the activation loop. **A-B.** H<sub>2</sub>O<sub>2</sub> resistance of the wild-type vector control (**A**, pRS313 or **B**, pRS403) or the indicated *tsa1*- or *tpk*-mutant strains in SD medium, 0.6 mM H<sub>2</sub>O<sub>2</sub>. Strains in **B**. carry pRS316-*TPK1* or pRS316-*tpk1C243A* as the only PKA catalytic subunit (genomic *tpk1Δtpk2Δtpk3Δ* deletions, n=3). **C.** H<sub>2</sub>O<sub>2</sub> resistance of *tpk1Δtpk2Δtpk3Δ* and *tpk1Δtpk2Δtpk3Δtsa1Δ* cells transformed with pRS313-*TPK1* or pRS313-*tpk1T241A* as indicated in SD medium 0.6 mM H<sub>2</sub>O<sub>2</sub> (n=3). **D-E.** Structural homology model of yeast Tpk1 (**D**) based on the structure of mouse type II PKA holoenzyme (**E**) [PDB ID 3TNP, (P. Zhang et al., 2012)]. **F-I.** Amino acids in the activation loop (in red) of Tpk1 in the Thr241 phosphorylated Cys243 non-modified (**F**), Thr241 non-phosphorylated Cys243 non-modified (**G**), Thr241 non-modified Cys243 glutathionylated (**H**) and Thr241 phosphorylated Cys243 glutathionylated (**I**) states in the Tpk1 structural homology model. The backbones are colored in light blue, carbon atoms in yellow, nitrogen atoms in blue, oxygen atoms in red and phosphor atoms in scarlet. The distance between Lys233 and phosphorylated Thr241 is 9.55 Å (**F**) whereas Lys233 and non-phosphorylated Thr241 reside 10.88 Å apart (**G**). *tpk2Δtpk3Δtsa1Δ* (*tsa1Δ*) as assayed by anti-glutathione immunoblot of immunoprecipitated Tpk1-HB in the absence of or 10 min following the addition of 0.4 mM H<sub>2</sub>O<sub>2</sub>. Extracts were separated under non-reducing (NR) or reducing (R) conditions. **J.** Overview of mechanisms by which glucose and H<sub>2</sub>O<sub>2</sub> control PKA activity. In green activators and in red inhibitors. See also **Figure 5 – figure supplement 1**.

## 1 Discussion

2 Caloric restriction is established as a measure that extends the lifespan of organisms from yeast to  
3 primates and this effect occurs by reduced nutrient and/or growth signaling through the insulin/IGF-1,  
4 TOR and protein kinase A pathways. However, which effectors/processes downstream of these  
5 pathways are regulating the rate of aging is still a matter of controversy. As nutrient signaling  
6 coordinates many different cellular processes, the exact identity of the accountable process may differ  
7 between organisms and/or CR protocols (Lamming & Anderson, 2014). The fact that several of the  
8 target processes proposed, as for instance vacuolar pH control and protein homeostasis, reciprocally  
9 feed-back control nutrient signaling (Molin & Demir, 2014; Yao et al., 2015; N. Zhang, Quan, Rash, &  
10 Oliver, 2013) has caused further obscured the designation of mechanisms important in slowing down  
11 aging. A novel integrative model of aging, however, posits that different pathways and/or organelles are  
12 intricately interconnected into so called integrons (Dillin, Gottschling, & Nystrom, 2014), the  
13 interconnectivity of which eventually causes a progressive decline of all systems through sequential  
14 collapse of homeostasis, when individual subsystems fail.

15 Peroxiredoxins have emerged as regulators of aging stimulating longevity in organisms from yeast to  
16 worms, flies and mice (De Haes et al., 2014; Hanzen et al., 2016; Lee et al., 2009; Molin et al., 2011;  
17 Olahova & Veal, 2015). We previously showed that the yeast peroxiredoxin Tsa1 is crucial for  
18 molecular chaperones to bind to aggregates forming in aged yeast cells (Hanzen et al., 2016), thus  
19 connecting peroxiredoxins to an aging factor conserved in many organisms. We linked this role to the  
20 sulfinylation of the enzyme primary catalytic cysteine and protein decamerization, thus providing a  
21 demonstration of the *in vivo* occurrence of this *in vitro*-described peroxiredoxin chaperone function  
22 (Jang et al., 2004; Noichri et al., 2015). We also previously observed that H<sub>2</sub>O<sub>2</sub> resistance in CR cells  
23 requires both catalytic cysteines (Molin et al., 2011), and metformin, which extends lifespan in worms,  
24 causes the accumulation of disulfide-linked Prdx-2 in worms. These data indicated that handling protein  
25 aggregates might not be the only means by which peroxiredoxins regulate aging. Data reported in this  
26 study now demonstrate a key role of both cysteines of Tsa1 in slowing down aging, also correlating  
27 peroxiredoxin-stimulated longevity and hydrogen peroxide resistance. Surprisingly, the requirement for  
28 peroxiredoxin-catalytic cysteines in both aging and H<sub>2</sub>O<sub>2</sub> resistance is not linked to H<sub>2</sub>O<sub>2</sub> scavenging,  
29 but to the modulation of PKA. Taken together with the Tsa1-dependent increased lifespan in cells grown  
30 in the continuous presence of low levels of H<sub>2</sub>O<sub>2</sub> (Goulev et al., 2017), these data demonstrate that one  
31 of the anti-aging effects of peroxiredoxins originates in H<sub>2</sub>O<sub>2</sub> signaling. Accordingly, what are the  
32 phenotypes dependent on the scavenging function of Tsa1, and of peroxiredoxins in general?  
33 Compelling arguments for local scavenging by mouse Prdx1 that modulate growth factor signaling have  
34 been made (Woo et al., 2010), but literature too often equate a requirement of peroxiredoxin catalytic  
35 cysteines with a role of the enzyme in scavenging. Our data now indicate that peroxiredoxins, when  
36 bearing its two catalytic residue, can override conventional second-messenger controlled signaling  
37 mechanisms to directly modulate protein kinase A signaling as a function of the level of H<sub>2</sub>O<sub>2</sub> (Figure  
38 5J).

39 How is this modulation of PKA by Tsa1 occurring? Our data provide evidence for a direct Tsa1-Tpk1  
40 physical interaction, Tsa1-dependent Tpk1 cysteine sulfenylation and deglutathionylation, and a  
41 requirement of Cys243 in H<sub>2</sub>O<sub>2</sub> resistance mediated by mild Tsa1 overexpression. Murine type II PKA  
42 is inactivated upon *in vitro* glutathionylation of the homologous Cys residue (C199) (Humphries, Deal,  
43 & Taylor, 2005; Humphries, Juliano, & Taylor, 2002). In type II rat PKA, the same Cys residue forms  
44 a disulfide bond with the regulatory subunit at very low levels of H<sub>2</sub>O<sub>2</sub> *in vitro* (1 μM), which decreases  
45 PKA activity (de Pina et al., 2008), again highlighting the importance of this residue in PKA redox  
46 regulation. The PKA regulatory subunit cysteine is however, only conserved in vertebrates, in contrast

1 to the catalytic subunit cysteine, which is conserved in PKA across eukaryotes (de Pina et al., 2008).  
2 How does PKA then become redox modified? Are glutathionylation and sulfenylation of the PKA  
3 catalytic Cys residues, mechanistically linked, and if so which of them occurs first? Peroxiredoxins can  
4 oxidize other proteins by virtue of promiscuity, but disulfide bond formation and not sulfenylation is  
5 expected to occur in this case (Stocker, Maurer, Ruppert, & Dick, 2018). Furthermore, we could not  
6 identify a Tpk1-Tsa1 mixed disulfide by kinetic trapping using a Tsa1 mutant lacking its resolving  
7 cysteine (Figure 4 -figure supplement 1A-C). Protein glutathionylation can occur non-enzymatically by  
8 condensation with a preformed sulfenate, a mechanism that may explain Tpk1 glutathionylation, but can  
9 also be catalyzed by a glutathione-S-transferase (J. Zhang, Ye, Singh, Townsend, & Tew, 2018). A  
10 pressing issue for the future will thus be to identify the mechanism by which Tpk1 becomes sulfenylated  
11 and glutathionylated and how peroxiredoxins, or possibly other redox enzymes assist these  
12 modifications.

13 The activities of both protein kinase G and A (PKAR1 $\alpha$ ) are also stimulated by H<sub>2</sub>O<sub>2</sub> (Burgoyne et al.,  
14 2007; Burgoyne et al., 2015). In the protein kinase G I $\alpha$  isoform, a disulfide linking its two subunits  
15 forms in rat cells exposed to H<sub>2</sub>O<sub>2</sub> (Burgoyne et al., 2007). Thus this regulation of PKA/PKG by H<sub>2</sub>O<sub>2</sub>  
16 involves the same Cys195 conserved cysteine in the catalytic subunit but leads to opposite effects.  
17 Similarly, *in vitro* studies suggest that the energy-sensing kinase AMPK is activated upon  
18 glutathionylation (Klaus et al., 2013). In worms and mammals, the endoplasmic reticulum (ER)  
19 transmembrane kinase Ire-1 is regulated by oxidation of another conserved Cys residue in the activation  
20 loop, situated 11 residues upstream of the here described PKA cysteine, at position +2 relative to the  
21 Mg<sup>2+</sup>-coordinating DFG motif (Hourihan et al., 2016). Furthermore, we recently found that another  
22 activation loop cysteine, positioned at DFG -1, in the fission yeast MAPKK, Wis1, restrains Wis1  
23 activation by low levels, but not high, levels of H<sub>2</sub>O<sub>2</sub> (Sjölander et al., 2020). These studies, together  
24 with the one presented here, pinpoint oxidation of cysteines in kinase activation loops as prevalent means  
25 of fine-tuning protein kinase function in response to H<sub>2</sub>O<sub>2</sub>.

26 In summary data presented here and in a previous study (Hanzen et al., 2016) point to two different  
27 independent mechanisms by which peroxiredoxins counteract aging and age-related disease (Figure 6).  
28 The first one, described here, involves catalytic cycling and inhibition of nutrient-related kinase  
29 signaling (Figure 6A-B). This mechanism appears critical for yeast to sustain normal longevity and is  
30 probably involved also in the ability of CR to slow down aging, since CR stimulates H<sub>2</sub>O<sub>2</sub> resistance in  
31 a manner dependent on Tsa1 catalytic cysteines (Molin et al., 2011). Along the same lines, metformin-  
32 stimulated longevity in worms also seems to involve increased Prdx-2 disulfide bond formation (De  
33 Haes et al., 2014). The second mechanism is the stimulation of chaperone-dependent protein quality  
34 control that counteract protein aggregation [Figure 6C, (Hanzen et al., 2016)]. Tsa1 sulfinylation is  
35 necessary to guide the molecular chaperones Hsp70 and Hsp104 to aggregates forming in aged and  
36 H<sub>2</sub>O<sub>2</sub>-treated cells. The requirement of both reduced PKA nutrient signaling and normal protein quality  
37 control (Hanzen et al., 2016) for mild Tsa1 overproduction to extend lifespan support a requirement of  
38 both these mechanisms for enhanced peroxiredoxin levels to extend lifespan (Figure 6C).

39 Cellular components and/or pathways that assimilate information from different subsystems, such as the  
40 above described nutrient signaling pathways, would thus be expected to have a key role as integrating  
41 hubs in the aging process. A role of PKA in integrating yeast homeostatic processes is also suggested  
42 by a genome-wide identification of genes controlling PKA regulatory-catalytic subunit interaction, and  
43 hence PKA activity, which found a striking number of known PKA targets, involved in glycogen  
44 accumulation, filamentous growth and amino-acid biosynthesis (Filteau et al., 2015). The role of  
45 peroxiredoxins of slowing down aging by modulating central nutrient signaling pathways agrees with

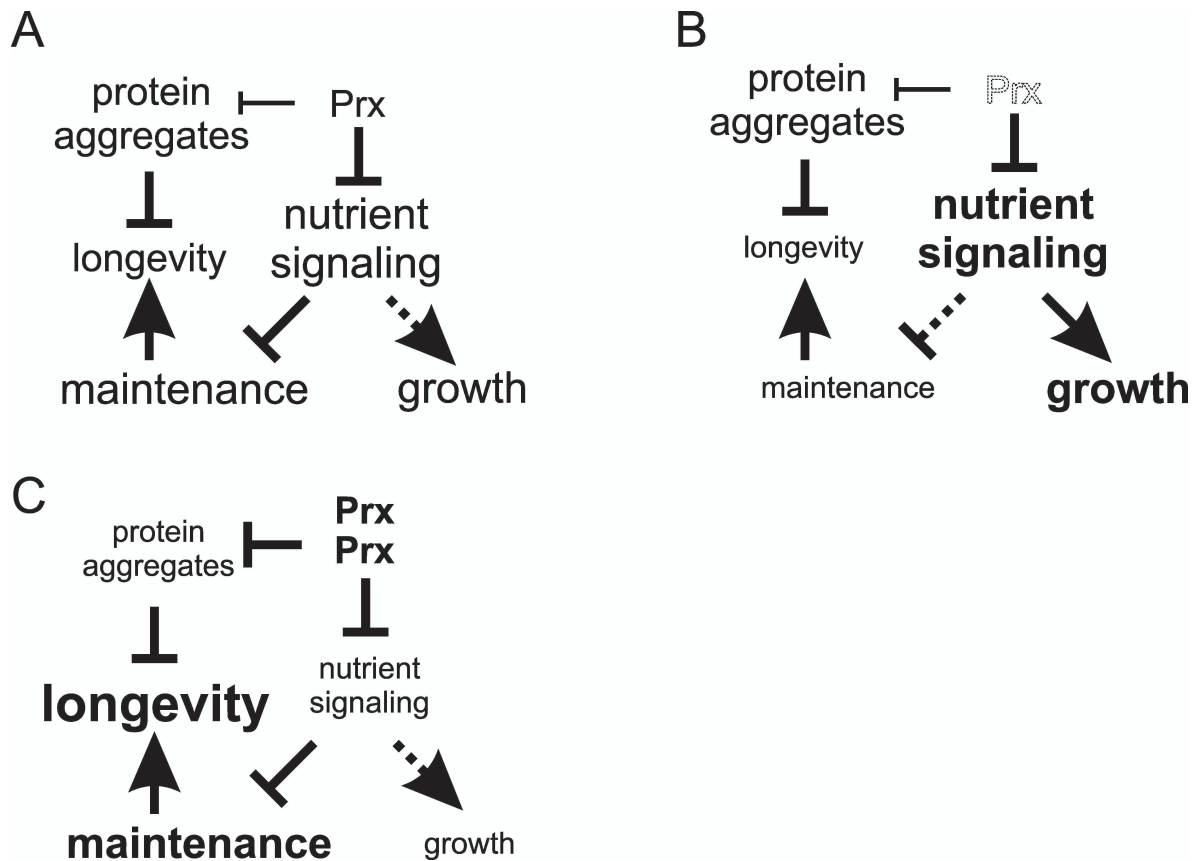

1  
2 **Figure 6.** Model of the mechanisms by which altered peroxiredoxin levels impacts on aging. In the first  
3 mechanism peroxiredoxin-dependent redox-signaling impacts in an unconventional manner on the PKA  
4 nutrient signaling kinase (this study) and in the other on proteostasis (Hanzen et al., 2016). **A)** In wild-  
5 type cells Tsa1 catalytic cycling maintains longevity by decreasing PKA-dependent nutrient signaling  
6 leading to the stimulation of maintenance but at the expense of growth. **B)** In cells lacking Tsa1, nutrient  
7 signaling is aberrantly increased leading to reduced maintenance and increased growth. **C)** Enforced  
8 expression of the peroxiredoxin Tsa1 slows down aging both by repressing nutrient signaling (this study)  
9 and by stimulating protein quality control mechanisms to reduce the levels of damaged and aggregated  
10 protein (Hanzen et al., 2016).

11 the integrative model of aging and suggest that also other anti-aging regimens might impact nutrient  
12 signaling.

13 The incidence of many major age-related diseases, such as cancer, diabetes and neurodegeneration, can  
14 be reduced by caloric restriction (Mattison et al., 2017), and there is hope that reducing caloric intake or  
15 pharmaceutically targeting key molecular mechanisms underlying its beneficial health effects, such as  
16 peroxiredoxins, will fuel healthy, disease-free ageing. As peroxiredoxins are conserved in organisms  
17 from bacteria to humans and can be targeted pharmaceutically, they constitute promising targets for the  
18 development of drugs against age-related disease.

### 19 **Acknowledgements**

20 We are grateful to Karin Voordeckers, Joseph Heitman and Robert J Deschenes for reagents and Mattias  
21 Johansson and Lainy Ramirez for technical assistance.

### 22 **Funding**

23 This work was supported by grants from the Swedish research Council VR, Cancerfonden, the  
24 Foundation Olle Engkvist byggmästare and Carl Tryggers stiftelse to MM, and ANR PrxAge and

1 ERRed2 to MBT. The funding sources had no role in study design, data collection and interpretation or  
2 the decision to submit for publication.

### 3 **Competing interests**

4 The authors declare that they have no conflict of interest.

### 5 **Author contributions**

6 Conceptualization M.M.; Methodology M.M., W.R., M.H., C.G., N.W., J.L.; Investigation F.R., C.P.,  
7 M.M., C.A., S.H., G.L., M.L.; Writing – original draft preparation M.M., F.R.; Writing – review and  
8 editing, M.B.T, M.M., F.R., T.N., W.R., M.G.; Project administration M.M., Supervision, M.M., M.G.

### 9 **References**

- 10 Abraham, M. J., Murtola, T., Schultz, R., Pall, S., Smith, J. C., Hess, B., & Lindahl, E. (2015).  
11 GROMACS: High performance molecular simulations through multi-level parallelism from  
12 laptops to supercomputers. *SoftwareX*, 54(7), 1932-1940.
- 13 Alic, N., & Partridge, L. (2011). Death and dessert: nutrient signalling pathways and ageing. *Curr*  
14 *Opin Cell Biol*, 23(6), 738-743. doi:10.1016/j.ceb.2011.07.006
- 15 Berendsen, H. J. C., Postma, J. P. M., Vangunsteren, W. F., Dinola, A., & Haak, J. R. (1984).  
16 Molecular-Dynamics with Coupling to an External Bath. *Journal of Chemical Physics*, 81(8),  
17 3684-3690. doi:Doi 10.1063/1.448118
- 18 Bilan, D. S., Pase, L., Joosen, L., Gorokhovatsky, A. Y., Ermakova, Y. G., Gadella, T. W. J., . . .  
19 Belousov, V. V. (2013). HyPer-3: A Genetically Encoded H<sub>2</sub>O<sub>2</sub> Probe with Improved  
20 Performance for Ratiometric and Fluorescence Lifetime Imaging. *ACS chemical biology*, 8(3),  
21 535-542. doi:10.1021/cb300625g
- 22 Biteau, B., Labarre, J., & Toledano, M. B. (2003). ATP-dependent reduction of cysteine-sulphinic acid  
23 by *S. cerevisiae* sulphiredoxin. *Nature*, 425(6961), 980-984.
- 24 Bodvard, K., Peeters, K., Roger, F., Romanov, N., Igbaria, A., Toledano, M. B., . . . Molin, M. (2017).  
25 Light-sensing via hydrogen peroxide and a peroxiredoxin. *Nat Commun*, 8, 14791.  
26 doi:10.1038/ncomms14791
- 27 Broach, J. R. (2012). Nutritional control of growth and development in yeast. *Genetics*, 192(1), 73-  
28 105. doi:10.1534/genetics.111.135731
- 29 Burgoyne, J. R., Madhani, M., Cuello, F., Charles, R. L., Brennan, J. P., Schroder, E., . . . Eaton, P.  
30 (2007). Cysteine redox sensor in PKG1 $\alpha$  enables oxidant-induced activation. *Science*,  
31 317(5843), 1393-1397. doi:10.1126/science.1144318
- 32 Burgoyne, J. R., Rudyk, O., Cho, H. J., Pryszyzna, O., Hathaway, N., Weeks, A., . . . Eaton, P.  
33 (2015). Deficient angiogenesis in redox-dead Cys17Ser PKAR1 $\alpha$  knock-in mice. *Nat*  
34 *Commun*, 6, 7920. doi:10.1038/ncomms8920
- 35 Caballero, A., Ugidos, A., Liu, B., Oling, D., Kvint, K., Hao, X., . . . Nystrom, T. (2011). Absence of  
36 mitochondrial translation control proteins extends life span by activating sirtuin-dependent  
37 silencing. *Molecular cell*, 42(3), 390-400. doi:10.1016/j.molcel.2011.03.021
- 38 Colombo, S., & Martegani, E. (2014). Methods to study the Ras2 protein activation state and the  
39 subcellular localization of Ras-GTP in *Saccharomyces cerevisiae*. *Methods Mol Biol*, 1120,  
40 391-405. doi:10.1007/978-1-62703-791-4\_24
- 41 Costanzo, M., Baryshnikova, A., Bellay, J., Kim, Y., Spear, E. D., Sevier, C. S., . . . Boone, C. (2010).  
42 The genetic landscape of a cell. *Science*, 327(5964), 425-431. doi:10.1126/science.1180823
- 43 Darden, T., York, D., & Pedersen, L. (1993). Particle Mesh Ewald - an N.Log(N) Method for Ewald  
44 Sums in Large Systems. *Journal of Chemical Physics*, 98(12), 10089-10092. doi:Doi  
45 10.1063/1.464397
- 46 De Haes, W., Frooninckx, L., Van Assche, R., Smolders, A., Depuydt, G., Billen, J., . . . Temmerman,  
47 L. (2014). Metformin promotes lifespan through mitohormesis via the peroxiredoxin PRDX-2.  
48 *Proc Natl Acad Sci U S A*, 111(24), E2501-2509. doi:10.1073/pnas.1321776111



- 1 de Pina, M. Z., Vazquez-Meza, H., Pardo, J. P., Rendon, J. L., Villalobos-Molina, R., Riveros-Rosas,  
2 H., & Pina, E. (2008). Signaling the signal, cyclic AMP-dependent protein kinase inhibition  
3 by insulin-formed H<sub>2</sub>O<sub>2</sub> and reactivation by thioredoxin. *J Biol Chem*, 283(18), 12373-12386.  
4 doi:10.1074/jbc.M706832200
- 5 Deprez, M. A., Eskes, E., Wilms, T., Ludovico, P., & Winderickx, J. (2018). pH homeostasis links the  
6 nutrient sensing PKA/TORC1/Sch9 menage-a-trois to stress tolerance and longevity. *Microb*  
7 *Cell*, 5(3), 119-136. doi:10.15698/mic2018.03.618
- 8 Depry, C., & Zhang, J. (2011). Using FRET-based reporters to visualize subcellular dynamics of  
9 protein kinase A activity. *Methods Mol Biol*, 756, 285-294. doi:10.1007/978-1-61779-160-  
10 4\_16
- 11 Dillin, A., Gottschling, D. E., & Nystrom, T. (2014). The good and the bad of being connected: the  
12 integrons of aging. *Curr Opin Cell Biol*, 26, 107-112. doi:10.1016/j.ceb.2013.12.003
- 13 Essmann, U., Perera, L., Berkowitz, M. L., Darden, T., Lee, H., & Pedersen, L. G. (1995). A Smooth  
14 Particle Mesh Ewald Method. *Journal of Chemical Physics*, 103(19), 8577-8593. doi:Doi  
15 10.1063/1.470117
- 16 Filteau, M., Diss, G., Torres-Quiroz, F., Dube, A. K., Schraffl, A., Bachmann, V. A., . . . Landry, C. R.  
17 (2015). Systematic identification of signal integration by protein kinase A. *Proc Natl Acad Sci*  
18 *U S A*, 112(14), 4501-4506. doi:10.1073/pnas.1409938112
- 19 Fontan-Lozano, A., Lopez-Lluch, G., Delgado-Garcia, J. M., Navas, P., & Carrion, A. M. (2008).  
20 Molecular bases of caloric restriction regulation of neuronal synaptic plasticity. *Mol*  
21 *Neurobiol*, 38(2), 167-177.
- 22 Fontana, L., Partridge, L., & Longo, V. D. (2010). Extending healthy life span--from yeast to humans.  
23 *Science*, 328(5976), 321-326. doi:10.1126/science.1172539
- 24 Fontana, L., Partridge, L., and Longo, V.D. (2010). Dietary Restriction, Growth Factors and Aging:  
25 from yeast to humans. *Science*, 328(5679), 321-326.
- 26 Garrett, S., & Broach, J. (1989). Loss of Ras activity in *Saccharomyces cerevisiae* is suppressed by  
27 disruptions of a new kinase gene, YAKI, whose product may act downstream of the cAMP-  
28 dependent protein kinase. *Genes Dev*, 3(9), 1336-1348.
- 29 Giaever, G., Chu, A. M., Ni, L., Connelly, C., Riles, L., Veronneau, S., . . . Johnston, M. (2002).  
30 Functional profiling of the *Saccharomyces cerevisiae* genome. *Nature*, 418(6896), 387-391.
- 31 Goldstein, A. L., & McCusker, J. H. (1999). Three new dominant drug resistance cassettes for gene  
32 disruption in *Saccharomyces cerevisiae*. *Yeast*, 15(14), 1541-1553.
- 33 Goulev, Y., Morlot, S., Matifas, A., Huang, B., Molin, M., Toledano, M., & Charvin, G. (2017).  
34 Nonlinear feedback drives homeostatic plasticity in H<sub>2</sub>O<sub>2</sub> stress response. *Elife*, 6, 23791.  
35 doi:<http://dx.doi.org/10.7554/eLife.23971>
- 36 Gueldener, U., Heinisch, J., Koehler, G. J., Voss, D., & Hegemann, J. H. (2002). A second set of loxP  
37 marker cassettes for Cre-mediated multiple gene knockouts in budding yeast. *Nucleic Acids*  
38 *Res*, 30(6), e23.
- 39 Hanzen, S., Vielfort, K., Yang, J., Roger, F., Andersson, V., Zamarbide-Fores, S., . . . Nystrom, T.  
40 (2016). Lifespan Control by Redox-Dependent Recruitment of Chaperones to Misfolded  
41 Proteins. *Cell*, 166(1), 140-151. doi:10.1016/j.cell.2016.05.006
- 42 Heilbronn, L. K., de Jonge, L., Frisard, M. I., DeLany, J. P., Larson-Meyer, D. E., Rood, J., . . .  
43 Pennington, C. T. (2006). Effect of 6-month calorie restriction on biomarkers of longevity,  
44 metabolic adaptation, and oxidative stress in overweight individuals: a randomized controlled  
45 trial. *JAMA*, 295(13), 1539-1548. doi:10.1001/jama.295.13.1539
- 46 Hess, B., Bekker, H., Berendsen, H. J. C., & Fraaije, J. G. E. M. (1997). LINCS: A linear constraint  
47 solver for molecular simulations. *Journal of Computational Chemistry*, 18(12), 1463-1472.  
48 doi:Doi 10.1002/(Sici)1096-987x(199709)18:12<1463::Aid-Jcc4>3.0.Co;2-H
- 49 Hoover, W. G. (1985). Canonical Dynamics - Equilibrium Phase-Space Distributions. *Physical Review*  
50 *A*, 31(3), 1695-1697. doi:DOI 10.1103/PhysRevA.31.1695
- 51 Hourihan, J. M., Moronetti Mazzeo, L. E., Fernandez-Cardenas, L. P., & Blackwell, T. K. (2016).  
52 Cysteine Sulfenylation Directs IRE-1 to Activate the SKN-1/Nrf2 Antioxidant Response. *Mol*  
53 *Cell*, 63(4), 553-566. doi:10.1016/j.molcel.2016.07.019

- 1 Humphries, K. M., Deal, M. S., & Taylor, S. S. (2005). Enhanced dephosphorylation of cAMP-  
2 dependent protein kinase by oxidation and thiol modification. *J Biol Chem*, 280(4), 2750-  
3 2758. doi:10.1074/jbc.M410242200
- 4 Humphries, K. M., Juliano, C., & Taylor, S. S. (2002). Regulation of cAMP-dependent protein kinase  
5 activity by glutathionylation. *J Biol Chem*, 277(45), 43505-43511.  
6 doi:10.1074/jbc.M207088200
- 7 Jacobson, M. P., Friesner, R. A., Xiang, Z., & Honig, B. (2002). On the role of the crystal environment  
8 in determining protein side-chain conformations. *J Mol Biol*, 320(3), 597-608.
- 9 Jang, H. H., Lee, K. O., Chi, Y. H., Jung, B. G., Park, S. K., Park, J. H., . . . Lee, S. Y. (2004). Two  
10 enzymes in one; two yeast peroxiredoxins display oxidative stress-dependent switching from a  
11 peroxidase to a molecular chaperone function. *Cell*, 117(5), 625-635.
- 12 Kenyon, C. J. (2010). The genetics of ageing. *Nature*, 464(7288), 504-512. doi:nature08980 [pii]  
13 10.1038/nature08980
- 14 Klaus, A., Zorman, S., Berthier, A., Polge, C., Ramirez, S., Michelland, S., . . . Schlattner, U. (2013).  
15 Glutathione S-transferases interact with AMP-activated protein kinase: evidence for S-  
16 glutathionylation and activation in vitro. *PLoS One*, 8(5), e62497.  
17 doi:10.1371/journal.pone.0062497
- 18 Kong, A. T., Leprevost, F. V., Avtonomov, D. M., Mellacheruvu, D., & Nesvizhskii, A. I. (2017).  
19 MSFragger: ultrafast and comprehensive peptide identification in mass spectrometry-based  
20 proteomics. *Nat Methods*, 14(5), 513-520. doi:10.1038/nmeth.4256
- 21 Lamming, D. W., & Anderson, R. M. (2014). Metabolic Effects of Caloric Restriction. In *eLS*: John  
22 Wiley & Sons, Ltd.
- 23 Lee, K. S., Iijima-Ando, K., Iijima, K., Lee, W. J., Lee, J. H., Yu, K., & Lee, D. S. (2009).  
24 JNK/FOXO-mediated neuronal expression of fly homologue of peroxiredoxin II reduces  
25 oxidative stress and extends life span. *J Biol Chem*, 284(43), 29454-29461. doi:M109.028027  
26 [pii] 10.1074/jbc.M109.028027
- 27 Leichert, L. I., & Dick, T. P. (2015). Incidence and physiological relevance of protein thiol switches.  
28 *Biol Chem*, 396(5), 389-399. doi:10.1515/hsz-2014-0314
- 29 Lin, S. J., Defossez, P. A., & Guarente, L. (2000). Requirement of NAD and SIR2 for life-span  
30 extension by calorie restriction in *Saccharomyces cerevisiae*. *Science*, 289(5487), 2126-2128.
- 31 Longo, V. D., Shadel, G. S., Kaeberlein, M., & Kennedy, B. (2012). Replicative and chronological  
32 aging in *Saccharomyces cerevisiae*. *Cell metabolism*, 16(1), 18-31.  
33 doi:10.1016/j.cmet.2012.06.002
- 34 Longtine, M. S., McKenzie, A., 3rd, Demarini, D. J., Shah, N. G., Wach, A., Brachat, A., . . . Pringle,  
35 J. R. (1998). Additional modules for versatile and economical PCR-based gene deletion and  
36 modification in *Saccharomyces cerevisiae*. *Yeast*, 14(10), 953-961. doi:10.1002/(SICI)1097-  
37 0061(199807)14:10<953::AID-YEA293>3.0.CO;2-U
- 38 Mashhoon, N., Carmel, G., Pflugrath, J. W., & Kuret, J. (2001). Structure of the unliganded cAMP-  
39 dependent protein kinase catalytic subunit from *Saccharomyces cerevisiae*. *Arch Biochem*  
40 *Biophys*, 387(1), 11-19. doi:10.1006/abbi.2000.2241
- 41 Mattison, J. A., Colman, R. J., Beasley, T. M., Allison, D. B., Kemnitz, J. W., Roth, G. S., . . .  
42 Anderson, R. M. (2017). Caloric restriction improves health and survival of rhesus monkeys.  
43 *Nat Commun*, 8, 14063. doi:10.1038/ncomms14063
- 44 Molin, M., & Demir, A. B. (2014). Linking Peroxiredoxin and Vacuolar-ATPase Functions in Calorie  
45 Restriction-Mediated Life Span Extension. *Int J Cell Biol*, 2014, 12. doi:10.1155/2014/913071
- 46 Molin, M., Logg, K., Bodvard, K., Peeters, K., Forsmark, A., Roger, F., . . . Blomberg, A. (2020).  
47 cAMP-dependent protein kinase controls the multifaceted biology of visible light. *BMC*  
48 *Biology*, under review.
- 49 Molin, M., Yang, J., Hanzen, S., Toledano, M. B., Labarre, J., & Nystrom, T. (2011). Life span  
50 extension and H<sub>2</sub>O<sub>2</sub>-resistance elicited by caloric restriction require the peroxiredoxin Tsa1 in  
51 *Saccharomyces cerevisiae*. *Mol Cell*, 43(5), 823-833. doi:10.1016/j.molcel.2011.07.027
- 52 Neumann, C. A., Krause, D. S., Carman, C. V., Das, S., Dubey, D. P., Abraham, J. L., . . . Van Etten,  
53 R. A. (2003). Essential role for the peroxiredoxin Prdx1 in erythrocyte antioxidant defence  
54 and tumour suppression. *Nature*, 424(6948), 561-565.

- 1 Noichri, Y., Palais, G., Ruby, V., D'Autreaux, B., Delaunay-Moisan, A., Nystrom, T., . . . Toledano,  
2 M. B. (2015). In vivo parameters influencing 2-Cys Prx oligomerization: The role of enzyme  
3 sulfinylation. *Redox Biol*, 6, 326-333. doi:10.1016/j.redox.2015.08.011
- 4 Nystrom, T., Yang, J., & Molin, M. (2012). Peroxiredoxins, gerontogenes linking aging to genome  
5 instability and cancer. *Genes Dev*, 26(18), 2001-2008. doi:10.1101/gad.200006.112
- 6 Olahova, M., & Veal, E. A. (2015). A peroxiredoxin, PRDX-2, is required for insulin secretion and  
7 insulin/IIS-dependent regulation of stress resistance and longevity. *Aging Cell*, 14(4), 558-  
8 568. doi:10.1111/ace1.12321
- 9 Parrinello, M., & Rahman, A. (1981). Polymorphic Transitions in Single-Crystals - a New Molecular-  
10 Dynamics Method. *Journal of Applied Physics*, 52(12), 7182-7190. doi:Doi 10.1063/1.328693
- 11 Peeters, K., Van Leemputte, F., Fischer, B., Bonini, B. M., Quezada, H., Tsytlonok, M., . . . Thevelein,  
12 J. M. (2017). Fructose-1,6-bisphosphate couples glycolytic flux to activation of Ras. *Nat*  
13 *Commun*, 8(1), 922. doi:10.1038/s41467-017-01019-z
- 14 Ponder, J. W., & Case, D. A. (2003). Force fields for protein simulations. *Adv Protein Chem*, 66, 27-  
15 85.
- 16 Rappsilber, J., Mann, M., & Ishihama, Y. (2007). Protocol for micro-purification, enrichment, pre-  
17 fractionation and storage of peptides for proteomics using StageTips. *Nat Protoc*, 2(8), 1896-  
18 1906. doi:10.1038/nprot.2007.261
- 19 Reiter, W., Anrather, D., Dohnal, I., Pichler, P., Veis, J., Grotli, M., . . . Ammerer, G. (2012).  
20 Validation of regulated protein phosphorylation events in yeast by quantitative mass  
21 spectrometry analysis of purified proteins. *Proteomics*, 12(19-20), 3030-3043.  
22 doi:10.1002/pmic.201200185
- 23 Santangelo, G. M. (2006). Glucose signaling in *Saccharomyces cerevisiae*. *Microbiol Mol Biol Rev*,  
24 70(1), 253-282.
- 25 Schulz, T. J., Zarse, K., Voigt, A., Urban, N., Birringer, M., & Ristow, M. (2007). Glucose restriction  
26 extends *Caenorhabditis elegans* life span by inducing mitochondrial respiration and increasing  
27 oxidative stress. *Cell metabolism*, 6(4), 280-293. doi:10.1016/j.cmet.2007.08.011
- 28 Sjölander, J. J., Tarczykowska, A., Cossio, I., Redwan, N., Corap, S., Gao, C., . . . Sunnerhagen, P.  
29 (2020). Enhanced MAPK peroxide signalling by a small molecule protecting fission yeast  
30 MAPKK Wis1 from inhibitory thiol oxidation. *Mol Cell Biol*, 40(7), e00346-00319.  
31 doi:10.1128/MCB.00346-19
- 32 Smith, A., Ward, M. P., & Garrett, S. (1998). Yeast PKA represses Msn2p/Msn4p-dependent gene  
33 expression to regulate growth, stress response and glycogen accumulation. *Embo J*, 17(13),  
34 3556-3564.
- 35 Sohal, R. S., & Forster, M. J. (2014). Caloric restriction and the aging process: a critique. *Free Radic*  
36 *Biol Med*, 73, 366-382. doi:10.1016/j.freeradbiomed.2014.05.015
- 37 Stocker, S., Maurer, M., Ruppert, T., & Dick, T. P. (2018). A role for 2-Cys peroxiredoxins in  
38 facilitating cytosolic protein thiol oxidation. *Nature chemical biology*, 14(2), 148-155.  
39 doi:10.1038/nchembio.2536
- 40 Stocker, S., Van Laer, K., Mijuskovic, A., & Dick, T. P. (2017). The Conundrum of Hydrogen  
41 Peroxide Signaling and the Emerging Role of Peroxiredoxins as Redox Relay Hubs. *Antioxid*  
42 *Redox Signal*. doi:10.1089/ars.2017.7162
- 43 Tagwerker, C., Flick, K., Cui, M., Guerrero, C., Dou, Y., Auer, B., . . . Kaiser, P. (2006). A tandem  
44 affinity tag for two-step purification under fully denaturing conditions: application in ubiquitin  
45 profiling and protein complex identification combined with in vivocross-linking. *Mol Cell*  
46 *Proteomics*, 5(4), 737-748. doi:10.1074/mcp.M500368-MCP200
- 47 Toda, T., Uno, I., Ishikawa, T., Powers, S., Kataoka, T., Broek, D., . . . Wigler, M. (1985). In yeast,  
48 RAS proteins are controlling elements of adenylate cyclase. *Cell*, 40(1), 27-36.
- 49 Truong, T. H., & Carroll, K. S. (2012). Bioorthogonal Chemical Reporters for Analyzing Protein  
50 Sulfenylation in Cells. *Current Protocols in Chemical Biology*, 4(2), 101-122.  
51 doi:10.1002/9780470559277.ch110219
- 52 Wilson, R. B., & Tatchell, K. (1988). SRA5 encodes the low-Km cyclic AMP phosphodiesterase of  
53 *Saccharomyces cerevisiae*. *Mol Cell Biol*, 8(1), 505-510.

- 1 Vizcaino, J. A., Csordas, A., del-Toro, N., Dianes, J. A., Griss, J., Lavidas, I., . . . Hermjakob, H.  
2 (2016). 2016 update of the PRIDE database and its related tools. *Nucleic Acids Res*, *44*(D1),  
3 D447-456. doi:10.1093/nar/gkv1145
- 4 Woo, H. A., Yim, S. H., Shin, D. H., Kang, D., Yu, D. Y., & Rhee, S. G. (2010). Inactivation of  
5 peroxiredoxin I by phosphorylation allows localized H<sub>2</sub>O<sub>2</sub> accumulation for cell signaling.  
6 *Cell*, *140*(4), 517-528. doi:10.1016/j.cell.2010.01.009
- 7 Yang, J., Gupta, V., Tallman, K. A., Porter, N. A., Carroll, K. S., & Liebler, D. C. (2015). Global, in  
8 situ, site-specific analysis of protein S-sulfenylation. *Nat Protoc*, *10*(7), 1022-1037.  
9 doi:10.1038/nprot.2015.062
- 10 Yao, Y., Tsuchiyama, S., Yang, C., Bulteau, A. L., He, C., Robison, B., . . . Schmidt, M. (2015).  
11 Proteasomes, Sir2, and Hxk2 form an interconnected aging network that impinges on the  
12 AMPK/Snf1-regulated transcriptional repressor Mig1. *PLoS Genet*, *11*(1), e1004968.  
13 doi:10.1371/journal.pgen.1004968
- 14 Zhang, J., Ye, Z. W., Singh, S., Townsend, D. M., & Tew, K. D. (2018). An evolving understanding of  
15 the S-glutathionylation cycle in pathways of redox regulation. *Free Radic Biol Med*, *120*, 204-  
16 216. doi:10.1016/j.freeradbiomed.2018.03.038
- 17 Zhang, N., Quan, Z., Rash, B., & Oliver, S. G. (2013). Synergistic effects of TOR and proteasome  
18 pathways on the yeast transcriptome and cell growth. *Open Biol*, *3*(5), 120137.  
19 doi:10.1098/rsob.120137
- 20 Zhang, P., Smith-Nguyen, E. V., Keshwani, M. M., Deal, M. S., Kornev, A. P., & Taylor, S. S. (2012).  
21 Structure and allostery of the PKA RIIbeta tetrameric holoenzyme. *Science*, *335*(6069), 712-  
22 716. doi:10.1126/science.1213979
- 23 Zhu, K., Borrelli, K. W., Greenwood, J. R., Day, T., Abel, R., Farid, R. S., & Harder, E. (2014).  
24 Docking covalent inhibitors: a parameter free approach to pose prediction and scoring. *J Chem*  
25 *Inf Model*, *54*(7), 1932-1940. doi:10.1021/ci500118s

26

27

## 1 **Materials and methods**

### 2 **Strains and growth conditions**

3 Yeast strains and plasmids are listed in Supplementary file 1 (Key resources table). The strains used in  
4 this study are derivatives of BY4741/BY4742. Strains were grown at 30°C in YPD 2% glucose (w/v) or  
5 in Yeast Nitrogen Base defined medium containing 2% glucose and complete supplement mixture  
6 (CSM) lacking the appropriate amino acids (Formedium) as described previously (Molin et al., 2011).  
7 To check the segregation of deletion markers in tetrad dissections YPD medium supplied with the  
8 following chemicals was used to check segregation of the dominant markers: *kanMX4* (G418 200  
9 µg/ml), *natMX4* (ClonNAT 100 µg/ml), *hphMX4* (Hygromycin B 300 µg/ml), *bleMX4* (Phleomycin 40  
10 µg/ml). To counterselect the p*TPK1-URA3* plasmid cells were grown in defined glucose CSM –HIS, 5-  
11 FOA medium containing YNB, glucose and CSM –URA, HIS; 50 mg/l uracil and 1 g/l 5-fluoroorotic  
12 acid.

### 13 **Strain and plasmid constructions**

14 Strains YMM170 (*ras2Δtsa1Δ*) and YMM172 (*pde2Δtsa1Δ*) were constructed by crossing strain  
15 YMM114 to BY4741 *ras2Δ::kanMX4* and BY4741 *pde2Δ::kanMX4* [Research Genetics, (Giaever et  
16 al., 2002)], respectively, and selecting for Mat alpha, methionine prototrophic, lysine auxotrophic, G418  
17 resistant and nourseothricin resistant progeny. Strains YMM171 and YMM173 were constructed by  
18 crossing a BY4741 *pde2Δ::hphMX4* {*pde2Δ::kanMX4* from the deletion collection [Research Genetics,  
19 (Giaever et al., 2002)] marker-switched (Goldstein & McCusker, 1999) to *pde2Δ::hphMX4* to strain  
20 YMM170 (*ras2Δtsa1Δ*) and selecting for Mat alpha, methionine prototrophic, lysine auxotrophic, G418  
21 resistant, hygromycin resistant and nourseothricin sensitive (YMM171 *ras2Δpde2Δ*) or nourseothricin  
22 resistant (YMM173 *ras2Δpde2Δtsa1Δ*) progeny. Strains YMM174 (*msn2Δmsn4Δ*), YMM175 (*pde2Δ*)  
23 and YMM176 (*pde2Δ o/e TSA1*) were constructed by crossing BY4741 *msn2Δmsn4Δ* (Caballero et al.,  
24 2011) or BY4741 *pde2Δ::kanMX4* [Research Genetics, (Giaever et al., 2002)] to strains YMM130 or  
25 BY4742 *his3ΔI::pRS403-Myc-TSA1*, respectively and selecting for Mat alpha, methionine prototrophic,  
26 lysine auxotrophic, histidine auxotrophic, hygromycin- and nourseothricin-resistant progeny  
27 (YMM174) or Mat alpha, methionine prototrophic, lysine auxotrophic, G418 resistant and histidine  
28 prototrophic progeny (YMM174 and YMM175). Strain YMM177 was constructed by marker-switching  
29 (Goldstein & McCusker, 1999) a Mat a *ras1Δ::kanMX4* spore, obtained from crossing strain BY4741  
30 *ras1Δ::kanMX4* [Research Genetics, (Giaever et al., 2002)] to strain YMM114 and selecting for Mat a,  
31 methionine prototrophic, lysine auxotrophic and G418 resistant progeny, to *ras1Δ::hphMX4*. Strain  
32 YMM178 (*tpk1Δ/TPK1 tpk2Δ/TPK2 tpk3Δ/TPK3*) was constructed by crossing a BY4742  
33 *tpk1Δ::kanMX4 tpk2Δ::natMX4* strain to a BY4741 *tpk3Δ::hphMX4* strain {*tpk3Δ::kanMX4* from the  
34 deletion collection [Research Genetics, (Giaever et al., 2002)] marker-switched (Goldstein and  
35 McCusker, 1999) to *tpk3Δ::hphMX4* resulting in a *tpk1Δ/TPK1 tpk2Δ/TPK2 tpk3Δ/TPK3* heterozygous  
36 diploid strain. A Mat alpha, G418- and hygromycin-resistant spore constitutes strain YMM179 whereas  
37 a Mat alpha, nourseothricin- and hygromycin-resistant spore constitutes strain YMM180. The BY4742  
38 *tpk1Δ::kanMX4 tpk2Δ::natMX4* strain was constructed by introducing *tpk2Δ::natMX4* PCR amplified  
39 from a BY4742 *tpk2Δ::natMX4* strain (Costanzo et al., 2010) into strain BY4741 *tpk1Δ::kanMX4*  
40 [Research Genetics, (Giaever et al., 2002)] selecting for nourseothricin- and G418-resistance and  
41 verifying the deletion by diagnostic PCR. A BY4742 *tpk1Δtpk2Δtpk3Δ pTPK1-URA3* haploid strain  
42 (YMM181) was constructed by transforming strain YMM177 with plasmid p*TPK1-URA3* and  
43 sporulating the strain selecting for a Mat alpha methionine prototrophic, lysine auxotrophic, G418-,  
44 nourseothricin-, hygromycin B-resistant and uracil auxotrophic progeny. Strains YMM182-YMM186  
45 were constructed by transforming strain YMM180 with plasmids pRS313 (YMM181), pRS313-*TPK1*

1 (YMM183), pRS313-*tpk1C243A* (YMM184) and pRS313-*tpk1C243D* (YMM185) and pRS313-  
2 *tpk1T241A* (YMM186). Counterselecting p*TPK1-URA3* on 5-FOA medium resulted in strains YMM187  
3 (BY4742 *tpk1Δtpk2Δtpk3Δ* pRS313-*TPK1*), YMM188 (BY4742 *tpk1Δtpk2Δtpk3Δ* pRS313-  
4 *tpk1C243A*), YMM189 (BY4742 *tpk1Δtpk2Δtpk3Δ* pRS313-*tpk1C243D*) and yMM190 (BY4742  
5 *tpk1Δtpk2Δtpk3Δ* pRS313-*tpk1T241A*), respectively. Strain YMM191 (*ras2Δtrx1Δtrx2Δ*) was  
6 constructed by crossing strain YMM113 (*ras2Δ*) to strain YMM143 (*trx1Δtrx2Δ*) selecting for Mat  
7 alpha, methionine prototrophic, lysine auxotrophic, G418-, nourseothricin- and hygromycin B-resistant  
8 progeny. Strain YMM192 was constructed by marker-switching strain BY4741 *tsa1Δ::kanMX4*  
9 [*Research Genetics, (Giaever et al., 2002)*] into BY4741 *tsa1Δ::bleMX4* using a *bleMX4* cassette PCR  
10 amplified from plasmid pUG66 (Guedener, Heinisch, Koehler, Voss, & Hegemann, 2002) using  
11 primers PR78 and PR79 (Goldstein & McCusker, 1999). Strain yMM193 was constructed by crossing  
12 strains yMM180 and yMM192 selecting for a Mat a, nourseothricin+, hygromycin+ and phleomycin+  
13 spore. Strain WR1832 was constructed by first introducing PCR amplified *trp1Δ::kanMX4* DNA  
14 (Longtine et al., 1998) into strain YMM180, verification of cassette integration by PCR and loss of the  
15 ability to grow without tryptophan supplement and next by *HBH::TRP1* C-terminal tagging of *TPK1*  
16 and PCR based verification as described (Tagwerker et al., 2006). Strains yCP101-yCP104 were  
17 constructed by crossing Mat a *his3Δ1::pRS403* or *his3Δ1::pRS403-myc-TSA1* spores, obtained in  
18 crosses generating strains yMM175 above, either to strain yMM183 or to strain yMM187 also carrying  
19 plasmid *pRS316-tpk1C243A*. Methionine prototrophic, lysine auxotrophic, histidine prototrophic, 5-  
20 FOA-sensitive, G418+, nourseothricin+ and hygromycin B+ progeny obtained in these crosses  
21 constitute strains yCP101-yCP104 listed in Table S1. Strains yCP105 and yCP106 were constructed by  
22 crossing strains yMM187 (p*TPK1*) or yMM189 (p*tpk1T241A*), respectively, to strain yMM192 selecting  
23 for Mat alpha, Met+, Lys-, G418+, Nat+, Hyg+, Phleomycin+, His+ progeny. Strain yCP107 was  
24 constructed by crossing strain WR1832 to yMM193 and selecting for Mat alpha, Met+, Lys-, G418+,  
25 Nat+, Hyg+, Phleomycin+, Trp+ progeny.

26 Plasmids pRS313-*tpk1C243A*, pRS313-*tpk1C243D*, pRS313-*tpk1T241A* and pRS316-*tpk1C243A*, were  
27 constructed by site directed mutagenesis of the pRS313-*TPK1* or pRS316-*TPK1* plasmids (Eurofins  
28 Genomics). Plasmids pRS315-*trx1C34S*-ProtA and pRS315-*trx2C31SC34S*-ProtA were constructed by  
29 site-directed mutagenesis of plasmid pRS315-*TRX2*-ProtA (GenScript). The correct sequence of all  
30 plasmids constructed was verified by sequencing.

### 31 Lifespan Analyses

32 Lifespan analyses were performed as previously described by counting the number of daughters  
33 produced in a cohort of mother cells (Erjavec et al., 2007).

### 34 2D-PAGE

35 Protein synthesis rates of the indicated proteins were determined in <sup>35</sup>S-Methionine labelled protein  
36 extracts separated by two-dimensional polyacrylamide gel electrophoresis as described (Maillet et al.,  
37 1996; Molin et al., 2011). Tsa1 sulfinylation was determined by comparing levels of sulfinylated Tsa1  
38 (Tsa1-SOOH) to non-sulfinylated Tsa1 on silver-stained 2D gels as described (Molin et al., 2011).

### 39 Spot tests

40 H<sub>2</sub>O<sub>2</sub> resistance was tested with mid-exponential-phase (*A*<sub>600</sub>=0.3, 3 × 10<sup>6</sup> cells/ml) cells that were  
41 diluted (x5, x50, x500, x5000, x50000) and spotted onto SD media containing 0 to 1 mM H<sub>2</sub>O<sub>2</sub> or YPD  
42 media containing 0 to 2 mM. The number of colonies after 2 days incubation at 30 °C on H<sub>2</sub>O<sub>2</sub> plates  
43 was divided with the number on control plates to get H<sub>2</sub>O<sub>2</sub>-resistance (%).

1 For glycogen accumulation, plates incubated for 2 days at 30 °C were exposed to iodine-bead fumes for  
2 2.5 min and scanned immediately.

### 3 **Spore viability**

4 The viability of spores segregating in the sporulation and dissection of a heterozygous diploid *ras1Δ::*  
5 *hphMX4/RAS1 ras2Δ::kanMX4/RAS2 tsa1Δ::natMX4/TSA1* strain obtained by crossing strain YMM176  
6 (*ras1Δ::hphMX4*) to strain YMM170 (BY4742 *ras2Δ::kanMX4 tsa1Δ::natMX4*) was analyzed after 4  
7 days of incubation at 30°C in 32 tetrads where 1) all markers analyzed (*hphMX4, kanMX4, natMX4,*  
8 *MET15, LYS2*) segregated 2:2, 2) the exact genotypes of all spores were possible to deduce from this  
9 information and 3) the genotypes of dead spores were assigned based on markers present in the other  
10 spores dissected from the same tetrads. Similarly, spore viability of spores segregating in a heterozygous  
11 diploid *tpk1Δ::kanMX4/TPK1 tpk2Δ::natMX4/TPK2 tpk3Δ::hphMX4/TPK3 tsa1Δ::bleMX4/TSA1,*  
12 obtained by crossing strain YMM191 (BY4741 *tsa1Δ::bleMX4*) to strain YMM186 (BY4742  
13 *tpk1Δ::kanMX4 tpk2Δ::natMX4 tpk3Δ::hphMX4* expressing pRS313-*TPK1*), was analyzed in 43 tetrads  
14 where all chromosomal markers analyzed (*kanMX4, natMX4, hphMX4, bleMX4, MET15, LYS2*)  
15 segregated 2:2. The ability to grow in the absence of histidine supplementation (-HIS) was taken as an  
16 indication that the pRS313-*TPK1* plasmid was present.

### 17 **Quantitative Real-Time PCR Analysis**

18 Cell cultures were harvested in mid-exponential phase and resuspended in 1 ml Trizol Reagent (Invit-  
19 rogen) and homogenized with silica beads by Fast prep (6.5 m/s, 30 sec, interval 2.5min, 4 °C). RNA  
20 was extracted using phenol chloroform extraction and precipitated with sodium acetate/ethanol. The  
21 pellet was treated with DNase for 30min followed by heat-inactivation of the enzyme. The RNA was  
22 purified with Invitrogen PureLink RNA Mini Kit columns and converted to cDNA following the  
23 QIAGEN QuantiTect Reverse Transcription Kit. Q-PCR was performed with 50ng cDNA by using  
24 BioRad iQ SYBR Green Supermix and quantified with the BioRad iCycler, iQ5. Relative levels of  
25 mRNA were calculated by using cycle times of *ACT1* as a reference gene.

### 26 **Quantitative analyses of Msn2-GFP localization**

27 Msn2-signaling was analyzed as described previously (Bodvard et al., 2017). Briefly, the fraction of  
28 cells displaying nuclear localization of Msn2-GFP (nucleus/cytoplasm signal ratio >1.28) at each time  
29 point was calculated and used to calculate the total time Msn2 spent in the nucleus during a 60 min  
30 experiment.

### 31 **Measurement of Ras2-GTP *in vivo***

32 Ras2-GTP level were measured as a ratio between Ras2-GTP and total Ras2 as described previously  
33 (Colombo & Martegani, 2014; Peeters et al., 2017). Mid-exponential phase yeast cells were harvested  
34 and lysed with glass- beads in Fast-prep (6.0 m/s, 20sec, interval 2.5 min) in lysis buffer [50 mM Tris-  
35 HCl, 200 mM NaCl, 2.5 mM MgCl<sub>2</sub>, 10% glycerol, 1% Triton X100, cComplete Protease inhibitor  
36 EDTA-free]. The supernatant with 1.5mg of total protein was incubated with a bed volume 50 μL of  
37 glutathione S-transferase (GST)-RBD fusion protein pre-bound to glutathione-Sepharose for 1 h at 4 °C  
38 and washed three times with lysis buffer by centrifugation. For elution the beads were boiled for 5 min  
39 at 98 °C in SDS-sample buffer (6% SDS, 62.5 mM Tris-HCl pH 8.7, 30% Glycerol, 0.75% β-  
40 mercaptoethanol). Through western blotting, Ras2-GTP and total Ras2 proteins were detected with anti-  
41 Ras2 antibodies. Determination of ratios between Ras2-GTP and total Ras2 was performed by ImageJ.

### 42 **cAMP measurement**

1 cAMP measurements were performed as previously described (Caballero et al., 2011; Parts et al., 2011).  
2  $2 \times 10^8$  cells grown to midexponential phase were pelleted, washed, and resuspended in 1 ml cold milliQ  
3 water. Metabolites were extracted by adding 1.2 ml TCA (0.5 M) and occasional vigorous vortexing  
4 while samples were kept on ice for 15 min. TCA was removed by ether extraction. cAMP levels were  
5 determined by the LANCE cAMP 384 kit in 40  $\mu$ L total reactions and by comparing to the standards  
6 supplied. The values for cAMP were normalized to the wild type level.

### 7 **Global H<sub>2</sub>O<sub>2</sub> scavenging in the medium**

8 Medium peroxide determinations were performed using a ferrithiocyanate spectrophotometric assay  
9 (Molin et al., 2007). After bolus addition of H<sub>2</sub>O<sub>2</sub>, 100  $\mu$ L sample aliquots were withdrawn and cultures  
10 were arrested by the addition of 1 ml ice-cold 10% TCA. After pelleting cells 180 mM KSCN and 1.4  
11 mM Fe(NH<sub>4</sub>)<sub>2</sub>(SO<sub>4</sub>)<sub>2</sub> final concentrations were added to the supernatants. Absorbance at 480 nm was  
12 subsequently determined and compared to equally TCA-treated H<sub>2</sub>O<sub>2</sub> standards diluted in medium.

### 13 **Isolation of old cells**

14 Old cells were obtained as previously described by sorting biotin-labeled mother cells using the  
15 MagnaBind streptavidin system (Sinclair and Guarente, 1997). Briefly, mid-exponential phase cells  
16 were labeled with EZ-Link Sulfo-NHS-LC Biotin and grown overnight in minimal media (CSM-His).  
17 The cells were incubated with streptavidin-conjugated magnetic beads for 2 h and then sorted  
18 magnetically with the unlabeled cells being washed away. Sorted cells were then grown overnight and  
19 the streptavidin labeling procedure was repeated before sorting one last time. After sorting the cells were  
20 incubated for 1 h in CSM-His media at 30 °C for recovery before microscopy.

### 21 **Measurements of cytoplasmic H<sub>2</sub>O<sub>2</sub> using HyPer3**

22 Fluorescence of the ratiometric probe HyPer-3 (Bilan et al., 2013) was acquired using an Olympus IX81  
23 motorized microscope with a PlanApoN 60x/1.42 Oil objective and a 12-bit Hamamatsu camera. Shifts  
24 in the fluorescence intensities were acquired with excitation around 500 nm (485/20 nm) and 420 nm  
25 (427/10 nm filter) and an emission filter around 520 nm (Fura 2 filter). For bolus addition of H<sub>2</sub>O<sub>2</sub>, cells  
26 in midexponential phase were incubated with 0.2 mM H<sub>2</sub>O<sub>2</sub> for 10 min and immediately imaged.

### 27 **Image analysis of HyPer3 fluorescence**

28 Image and signal analysis was performed using the MATLAB toolbox 2016b. Cell segmentation is  
29 performed with the CellX algorithm using the bright-field channel. The fluorescent intensity data was  
30 obtained from fluorescent images and data is presented as the median 500 nm fluorescent signal  
31 normalized to the median fluorescent 420 nm signal by dividing the latter with the former.

### 32 **AKAR4 FRET-based PKA activity measurements**

33 Detection of cyan fluorescent protein CFP to yellow fluorescent protein YFP FRET in the AKAR4  
34 sensor was performed as described previously (Depry & Zhang, 2011; Molin et al., 2020). CFP was  
35 excited at 427/10 nm, YFP was excited at 504/6 nm and emission was monitored using a Semrock dual  
36 bandpass filter (part no: FF01-464/547). Images were acquired using an automated epi-fluorescence  
37 microscope (Olympus IX81) equipped with a  $\times 60$  oil-immersion objective (numerical aperture 1.4,  
38 PlanApoN  $\times 60/1.42$  Oil, Olympus) and an electron-multiplying charge-coupled device camera (12-bit  
39 Hamamatsu camera). The yeast cells were kept in a heated perfusion chamber (FCS2, Bioprotechs Inc.)  
40 at 28 °C to avoid heat-induced stress responses. The objective was heated to 26.2 °C (according to  
41 the manufacturer's instructions) to maintain a stable temperature in the perfusion chamber. The



1 cover glasses were precoated for 1.5 h with protein concanavalin A, 0.5  $\mu\text{g } \mu\text{l}^{-1}$  in 0.01 M PBS,  
2 to immobilize yeast cells on the surface

### 3 **Immunoprecipitation**

4 Cells from 50 mL/sample of mid-exponential phase YPD culture was pelleted, the pellet was washed  
5 with cold water and pelleted again, washed with 1 mL lysis buffer (50 mM Tris HCl pH 8.0, 150 mM  
6 NaCl, 1 mM EDTA, 10% Glycerol, 5 mM  $\text{MgCl}_2$  and protease-inhibitor cocktail). Cells were broken in  
7 0.35 mL lysis buffer by beads at 4 degrees in a Fastprep FP120 cell disrupter (Bio101/ThermoSavant,  
8 speed 5 m/sec, 4 times 40 seconds with > 1 min on ice in between each agitation). The extract was  
9 pelleted at 12500 rpm at 4 degrees and the supernatant was used for subsequent analyses. An aliquot of  
10 supernatant was withdrawn for analysis of input protein levels (load sample). Beads were prewashed  
11 with lysis-buffer (100  $\mu\text{L}$ ) before incubated with protein extract (300  $\mu\text{L}$  at 1 $\mu\text{g}/\mu\text{L}$ ) at 4 degrees  
12 overnight. Beads were pelleted by centrifugation at 1000 rpm, 1 min, washed 3 times with lysis buffer  
13 and boiled at 95°C, 5 min with Laemmli buffer (IP sample). 10  $\mu\text{L}$  of each sample was separated on an  
14 SDS-PAGE gel for 1.5 h at 120V and blotted as described below. Membranes were incubated overnight  
15 with the primary antibody at 4 degrees.

### 16 **Immunoblot analysis**

17 Immunoblot analysis of selected proteins was performed as described previously (Biteau, Labarre, &  
18 Toledano, 2003; Molin et al., 2011). Prior to separation on 12% Bis-Tris NuPAGE gels using an XCell  
19 SureLock MiniCell (Invitrogen) in NuPAGE MOPS running buffer as recommended by the supplier  
20 protein extracts were heated in Laemmli buffer (pH 8.7) either in the presence of  $\beta$ -mercaptoethanol (5%,  
21 reducing) or not (non-reducing) as indicated. Transfer to Immobilon-FL PVDF membranes was done  
22 using an XCell II Blot Module kit. Membranes were analyzed by the Odyssey infrared imaging system  
23 (LI-COR biosciences) as recommended by the suppliers.

24 Glutathionylation of Tpk1 was assayed using anti-glutathione immunoblot on Tpk1-HB  
25 immunoprecipitated by  $\text{Ni}^{2+}$ -Sepharose beads following a simplified protocol similar to that used during  
26 MS sample preparation (see below). We verified that the anti-glutathione immunoblot signal in Tpk1  
27 completely disappeared upon extract reduction by  $\beta$ -mercaptoethanol.

### 28 **Growth conditions for MS analysis**

29 Cells were grown at 30°C in yeast extract/peptone (YP) medium, containing 2% glucose as carbon  
30 source. Three independent experimental replicates were performed for each experimental condition. For  
31 each replicate, we inoculated 750ml YPD cultures, which were incubated (with shaking) overnight until  
32  $\text{OD}_{600} = 1$ . Oxidative stress was induced by adding 0.4 mM or 0.8 mM (final concentration)  $\text{H}_2\text{O}_2$  for  
33 10 minutes.

### 34 **Mass spectrometric sample preparation**

35 HB (poly histidine, biotinylation signal) tandem affinity purifications were performed as described  
36 elsewhere (Reiter et al., 2012). Cells were harvested by filtration and immediately deep-frozen in liquid  
37  $\text{N}_2$ . Cells were grinded using a SPEX Freezer Mill 6870 (SPEXSamplePrep, Metuchen, NJ, USA) with  
38 the following settings: 7 cycles: 3 min breakage (15 CPS), 3 min cooling, resuspended in buffer 1 (6 M  
39 guanidine HCl, 50 mM Tris pH8.0, 5 mM NaF, 1 mM PMSF, 0.1% Tween, cComplete Protease inhibitor  
40 cocktail, pH 8) and cleared of debris by centrifugation 13.500 x g, 15 min, 4°C. Cleared extracts were  
41 incubated (4 hours, room temperature) with  $\text{Ni}^{2+}$ -Sepharose beads, washed with urea buffer (8M urea,

1 50mM sodium phosphate buffer pH8.0, 300mM NaCl, 0.1% Tween20) and urea buffer pH 6.3. Proteins  
2 were eluted in urea buffer pH 4.3 containing 10mM EDTA, incubated overnight with streptavidin-  
3 agarose beads, washed using urea wash buffer containing 1% SDS and urea wash buffer without SDS.  
4 Beads were washed five times with 50 mM ammonium bicarbonate (ABC). Cys-residues were alkylated  
5 with IAA (25% w/w of the estimated amount of protein). Excess IAA was washed out by ABC. Proteins  
6 were digested with 300 ng trypsin at 37°C overnight. Digestion was stopped with trifluoroacetic acid  
7 (0.5% final concentration) and the peptides were desalted using C18 Stagetips (Rappsilber, Mann, &  
8 Ishihama, 2007). 50 fmol of the Peptide Retention Time Calibration Mixture was spiked in each sample  
9 for quality control.

## 10 **Mass spectrometry analysis of Tpk1**

11 Peptides were separated on an Ultimate 3000 RSLC nano-flow chromatography system (Thermo-  
12 Fisher), using a pre-column (Acclaim PepMap C<sub>18</sub>, 2 cm × 0.1 mm, 5 μm, Thermo-Fisher), and a C<sub>18</sub>  
13 analytical column (Acclaim PepMap C<sub>18</sub>, 50 cm × 0.75 mm, 2 μm, Thermo-Fisher). A segmented  
14 linear gradient from 2% to 35% solvent B (solvent B: 80% acetonitrile, 0.1% formic acid; solvent A:  
15 0.1% formic acid) was applied at a flow rate of 230 nL/min over 120 min. A Proxeon nanospray flex  
16 ion source (Thermo Fisher) using coated emitter tips (New Objective) was used for ionization. The  
17 capillary temperature was set to 200°C. Peptides were analyzed on an Orbitrap Fusion Lumos Tribrid  
18 mass spectrometer (Thermo Fisher). The mass spectrometer was operated in data-dependent mode,  
19 survey scans were obtained in a mass range of 380-1500 m/z with lock mass activated, at a resolution  
20 of 120,000 at 200 m/z and an automatic gain control (AGC) target value of 4E5. The maximum cycle  
21 time was set to 2.5 s and the most abundant precursors were selected for fragmentation by high-energy  
22 collision at 30% collision energy. Fragmented precursors were excluded from further fragmentation for  
23 30s (with +/- 5 ppm accuracy) and peptides with charge +1 or > +6 were excluded from MS/MS analysis.  
24 The most abundant Tpk1 Cys containing peptide forms have been added to an inclusion list as specified  
25 in the raw files. MS proteomics data have been deposited to the ProteomeXchange Consortium through  
26 the Proteomics Identifications database (PRIDE) partner repository (Vizcaino et al., 2016) with the data  
27 set identifiers PXD012617.

## 28 **Closed database search**

29 Peptide identification and label free quantification (LFQ) were performed using MaxQuant (version  
30 1.6.0.16) with default parameters. *Saccharomyces cerevisiae* reference proteome database (UniProt,  
31 version January 2017) in combination with a common laboratory contaminants database (MQ) was used  
32 for peptide spectrum matching. N-terminal acetylation, deamidation of asparagine and glutamine,  
33 oxidation of methionine, tri-oxidation and glutathionylation of cysteine and phosphorylation of serine,  
34 threonine and tyrosine were set as variable protein modification. Carbamidomethylation of cysteine was  
35 set as fixed. A maximum of 5 variable modifications per peptide was allowed. Leucine and isoleucine  
36 were treated as indistinguishable. Enzyme specificity was set to “Trypsin/P”. A maximum of 2 missed  
37 cleavages per peptide was allowed. ‘Requantify’ and “Match between runs” was activated. MaxLFQ  
38 (implemented in the MaxQuant package) was used for MS1-based label free quantification and  
39 normalization of protein groups.

## 40 **Open search analysis of selected peptides**

41 To screen for protein modifications in an unbiased manner we initially performed an open search using  
42 MSFragger in FragPipe (Kong, Leprevost, Avtonomov, Mellacheruvu, & Nesvizhskii, 2017). The  
43 default open search parameters were used, with trypsin specificity, +/- 500 Da windows and oxidation

1 of methionine and carbamidomethylation of cysteine as variable modifications. The observed mass  
2 shifts were inspected and filtered for the most abundant and relevant modifications occurring in Tpk1.

### 3 **Targeted mass-spectrometry**

4 Parallel-Reaction-Monitoring (PRM) assays were generated based on the peptide information obtained  
5 by MaxQuant. We selected Tpk1 and Tsa1 peptides for targeted relative LFQ as specified in Expanded  
6 View tables XY, datasheets 4 to 6. Peptides were separated using a 120 min gradient (HPLC setup as  
7 described above). PRM data acquisition was performed using a scheduled method with 20 min windows  
8 for each target based on the retention time determined in the shotgun-approach. Raw data were obtained  
9 on an Orbitrap Q Exactive HF-X (Thermo Fisher Scientific) mass spectrometer applying the following  
10 settings: survey scan with 60k resolution, AGC 1E6, 60 ms IT, over a range of 400 to 1400 m/z, PRM  
11 scan with 30 k resolution, AGC 1E5, 200 ms IT, isolation window of 1.0 m/z with 0.3 m/z offset, and  
12 NCE of 27%.

13 Wash runs were checked for potential peptide carry-over in between samples using same HPLC and MS  
14 methods. Data analysis, manual validation of all transitions (based on retention time, relative ion  
15 intensities, and mass accuracy), and relative quantification was performed in Skyline. Up to six  
16 characteristic transitions were selected for each peptide and their peak areas were summed for peptide  
17 quantification (total peak area). MS1 signals of PRTC standards were used as global standards for  
18 normalization in Skyline to account for fluctuations in instrument performance. The mean of the log2  
19 Tpk1 non-modified peptide intensities was used to normalize Tpk1 modified peptides and Tsa1 peptides  
20 to account for differences in Tpk1 levels. Tsa1 peptide intensities (anti-log) were summed up to obtain  
21 values for relative protein abundance.

### 22 **Cysteine sulfenylation assay by DYn-2 labeling, protein extraction and click chemistry**

23 Mid-exponential cells (10 ml at  $OD_{600}=0.5$ ) were treated with of DYn-2 (0.5 mM) for 30 min, at 30 °C  
24 and cell suspensions were next exposed to 0.5 mM  $H_2O_2$  for 5 min. To the cultures trichloroacetic acid  
25 (TCA) was added to a final concentration of 20 %, followed by centrifugation (6000 x g, 5 min, 4°C)  
26 and pellets were lysed with glass beads (equivalent of 0.1 ml of beads) in 0.2 ml of TCA (20 %). Lysates  
27 were centrifuged (14000 x g, 15 min, 4°C) and pellets were washed twice with acetone, dried and  
28 solubilized in 0.2 ml Hepes (100 mM) buffer containing cOmplete™ mini EDTA-free protease inhibitor  
29 cocktail (Roche) (1 tablet/20 ml of buffer solution), 25 µg/ml phenylmethylsulfonyl fluoride, 0.1%  
30 Nonidet P-40, 2% SDS, pH 7.4. Protein content was determined using a standard DC Protein Assay  
31 (Bio-Rad). A copper (I)-catalyzed azide-alkyne cycloaddition (CuAAC) click chemistry reaction was  
32 performed on 0.2 mg of protein as previously described (Truong & Carroll, 2012; Yang et al., 2015).  
33 Briefly, cyanine5 azide (0.5 mM), copper(II)-TBTA complex (1 mM) and ascorbate (2 mM) were added  
34 to the lysates, protected from light and incubated for 1 h at room temperature under rotation. The CuAAC  
35 reaction was quenched by adding EDTA (1 mM) for 10 min. The solution was precipitated by  
36 methanol/chloroform precipitation (sample/methanol/chloroform, 4/4/1 (v/v/v)) and centrifuged (14000  
37 x g, 15 min, 4°C). The protein pellet obtained were between the organic and aqueous layers, both layers  
38 were aspirated. A solution of methanol/chloroform ( $H_2O$ /methanol/chloroform, 4/4/1 (v/v/v)) was added  
39 to the protein pellet and centrifuged (14000 x g, 15 min, 4°C). Both layers were aspirated and the  
40 obtained pellet was subsequently washed twice with methanol. Protein pellets were resuspended in 100  
41 mM Hepes buffer containing 2% SDS. Biotinylated proteins were enriched with Pierce™ streptavidin  
42 bead (Thermo Scientific™). The protein pellets were mixed to a pre-washed streptavidin beads (100  
43 mM Hepes buffer). The samples were incubated for 2h at room temperature and subsequently washed  
44 twice with 1% SDS, twice with 4M urea, once with 1M NaCl and twice with PBS. After each wash step,

1 beads were collected by centrifugation. Beads were finally resuspended in 5X Laemmli buffer and  
2 boiled for 5 min at 95 °C. Samples were resolved by SDS-PAGE and analyzed for fluorescence at 700  
3 nm (Cyanine5) on an Odyssey CLx (Licor).

#### 4 **Homology modeling**

5 A model of the yeast PKA tetramer structure was obtained by homology modeling. The protein  
6 sequences of yeast Tpk1 (catalytic subunit of PKA) and Bcy1 (regulatory subunit of PKA) were obtained  
7 from Genbank (ID: 1023942850 and ID: 1023943330, respectively). The crystal structure of mouse  
8 PKA (PDBID: 3TNP) was used as the template for the homology calculations. The catalytic and  
9 regulatory subunits of yeast PKA and mouse PKA shares 48% and 42% sequence similarity,  
10 respectively. The homology model was built using StructurePrediction panel (Jacobson, Friesner, Xiang,  
11 & Honig, 2002) in Schrödinger Suite (Schrödinger, LLC, New York, NY). The ClustralW method was  
12 used to align the target and template sequences in Prime, the energy-based was selected for model  
13 building method, and homo-multimer was selected for multi-template model type.

#### 14 **Covalent docking**

15 Covalent docking was carried out to obtain a model for glutathionylated Tpk1. The Tpk1 crystal  
16 structure [PDB ID: 1FOT, (Mashhoon, Carmel, Pflugrath, & Kuret, 2001)] were prepared using the  
17 Protein Preparation utility in Schrodinger to assign the correct protonation state and fix the missing side  
18 chains and loops. The glutathione was built by 3D builder and prepared by LigPre utility in Schrodinger.  
19 The Covalent-Dock panel (Zhu et al., 2014) in Schrodinger was used to predict the pose of the  
20 glutathione attaching to Cys243. The reaction type was set to be disulfide formation, the docking mode  
21 was set to be thorough pose prediction, the other parameters were all set to be default. At the final step,  
22 Prime Energy was used to rank the poses of the ligand. Covalent docking was performed on  
23 dephosphorylated Tpk1 structure.

#### 24 **Molecular dynamics simulations**

25 Molecular dynamics simulations were carried out to study structural changes of Tpk1 upon  
26 phosphorylation and glutathionylation. MD simulations non-modified Tpk1, Cys243 glutathionylation  
27 Tpk1, Thr241 phosphorylation Tpk1, Cys243 glutathionylation and Tpk1 phosphorylation co-existed  
28 Tpk1 were carried out. The GROMACS software (Abraham et al., 2015) was used for the MD  
29 simulations and the Amber 99 (Ponder & Case, 2003) force field was selected to assign the parameters  
30 for different amino acid residues. The glutathionylation and phosphorylation parameters was generated  
31 from Ambertools, and incorporated into the GROMACS software.

32 The systems were solvated with a buffer distance of 10.0 Å TIP3P water in periodic boxes, and then 0.1  
33 mol/L of Na<sup>+</sup> and Cl<sup>-</sup> ions were added to adjust the systems to electroneutrality condition. Then 200  
34 steps of the steepest descent energy minimization was carried out to remove close contacts in the  
35 obtained systems. A 2ns position-restrained simulation with a constant pressure ensemble (NPT) was  
36 performed to make sure the water molecules would reach more favorable positions. The parameters for  
37 position-restrained simulation are set to be: a time step = 1 fs, temperature = 298 K, and coupling  
38 pressure = 1 bar, Coulomb cutoff = 10 Å, Lennard-Jones cutoff = 10 Å, particle-mesh Ewald summation  
39 (Darden, York, & Pedersen, 1993; Essmann et al., 1995) was used for longrange electrostatics. The  
40 temperature and pressure was controlled by Berendsen coupling algorithm (Berendsen, Postma,  
41 Vangunsteren, Dinola, & Haak, 1984), with the time constants of 0.1 ps for temperature and 1.0 ps for  
42 pressure coupling. All bond lengths was constrained by the LINCS algorithm (Hess, Bekker, Berendsen,  
43 & Fraaije, 1997). Following the position-restrained simulation, 100 ns production simulations with NPT

1 ensemble were performed on each system for further study the protein conformational changes. In this  
2 step, the Nose–Hoover thermostat (Hoover, 1985), with a time constant 0.1 ps, was used to control the  
3 temperature and the Parrinello–Rahman barostat (Parrinello & Rahman, 1981), with a time constant 1.0  
4 ps, was used to control the pressure. The other parameters were the same as those in the position-  
5 restrained simulations.

## 6 Quantification and statistical analysis

7 All experiments were repeated at least three times (biological replicates) to ensure reproducibility.  
8 Biological replicates of experiments were performed in separate, independent experiments (typically on  
9 a separate day). No data were excluded in averages/median values presented in figures. Details on the  
10 number of replicates and statistical analyses performed in relation to the specific figures are available  
11 below.

12 **Figure 1. B)** Lifespans were tested for statistical significance by the Mann-Whitney U test  
13 ([www.socscistatistics.com/tests/mannwhitney/Default2.aspx](http://www.socscistatistics.com/tests/mannwhitney/Default2.aspx)). **B)** Lifespans of wt control and o/e  
14 *TSAl* strains are significantly different using the Mann Whitney U test (n=167 and 168 cells,  
15  $p < 0.00001$ ). Lifespans of *pde2Δ* control and *pde2Δ* o/e *TSAl* strains are not significantly different (n=81  
16 and 84, respectively,  $p = 0.58$ ). **D)** Hsp12 levels are significantly different between control and o/e *TSAl*  
17 strains (n=3,  $p = 0.033$ ) whereas Act1 levels are not (n=3,  $p = 0.69$ ). **E)** Lifespans of the wt (n=157) vs the  
18 *tsalΔ* (n=293) and the *tsalΔ* vs *ras2ΔtsalΔ* (n=283) are significantly different at  $p < 0.00001$ . The  
19 lifespan of the *ras2Δ* (n=138) is not significantly different from the *ras2ΔtsalΔ* ( $p = 0.276$ ). **F)** Lifespans  
20 of the wt (n=157) vs the *pde2Δ* (n=120), the *ras2ΔtsalΔ* vs *ras2Δpde2ΔtsalΔ* (n=164) and the *tsalΔ*  
21 (n=293) vs *pde2ΔtsalΔ* (n=242) are significantly different at  $p < 0.00001$ . Lifespans of the *ras2Δpde2Δ*  
22 (n=124) vs *pde2Δ* are significantly different ( $p = 0.00068$ ) whereas the lifespans of *pde2Δ* vs *pde2ΔtsalΔ*  
23 are not significantly different ( $p = 0.757$ ).

24 **Figure 2. A)** Doubling times of wt and *ras2Δ* strains are significantly different at  $p = 0.047$  whereas the  
25 difference between the *tsalΔ* and the *ras2ΔtsalΔ* is not statistically significant using a two-sided t-test  
26 assuming equal variance ( $p = 0.77$ ). **C)** Doubling times of control and mc-*IRA2* strains are significantly  
27 different for the wt (n=7 each,  $p = 7.4 \times 10^{-6}$ ), the *tsalΔYF* (n=3 and 4, respectively,  $p = 0.0032$ ),  
28 *msn2Δmsn4Δ* (n=3 each,  $p = 0.026$ ) and *trx1Δtrx2Δ* (n=15 and 13, respectively,  $p = 0.012$ ). In none of the  
29 other strains are control and mc-*IRA2* different (*tsalΔ* n=3 each,  $p = 0.87$ ; *tsalC48S*, n=3 each,  $p = 0.71$ ;  
30 *tsalC171S*, n=4 each,  $p = 0.11$ ; *tsalΔYFC171S*, n=4 each,  $p = 0.77$ ; *pde2Δ*, n=3 each,  $p = 0.66$ ). **D)** Relative  
31 *HSP12* levels were significantly different between wt control and mc-*IRA2* strains (n=15 and 9,  
32 respectively,  $p = 1.0 \times 10^{-14}$ ), between wt mc-*IRA2* and *tsalΔ* mc-*IRA2* strains (n=9 and 8, respectively,  
33  $p = 1.9 \times 10^{-6}$ ), between wt mc-*IRA2* and *tsalC171S* mc-*IRA2* strains (n=9 and 4, respectively,  $p = 0.026$ ),  
34 between wt mc-*IRA2* and *tsalΔYFC171S* mc-*IRA2* strains (n=9 and 6, respectively,  $p = 0.00083$ ) and  
35 between wt mc-*IRA2* and *pde2Δ* mc-*IRA2* strains (n=9 and 6, respectively,  $p = 4.8 \times 10^{-8}$ ). No significant  
36 difference was seen between wt mc-*IRA2* and *tsalΔYF* mc-*IRA2* strains (n=9 and 3, respectively,  
37  $p = 0.53$ ). Relative *CTTI* levels were significantly different between wt control and mc-*IRA2* strains  
38 (n=24 and 21, respectively,  $p = 3.4 \times 10^{-13}$ ), between wt mc-*IRA2* and *tsalΔ* mc-*IRA2* strains (n=21 and  
39 6, respectively,  $p = 0.0073$ ), between wt mc-*IRA2* and *tsalC171S* mc-*IRA2* strains (n=9 and 4,  
40 respectively,  $p = 0.026$ ), between wt mc-*IRA2* and *tsalΔYF* mc-*IRA2* strains (n=21 and 3, respectively,  
41  $p = 0.027$ ), between wt mc-*IRA2* and *tsalΔYFC171S* mc-*IRA2* strains (n=21 and 6, respectively,  $p = 4.9$   
42  $\times 10^{-5}$ ) and between wt mc-*IRA2* and *pde2Δ* mc-*IRA2* strains (n=21 and 6, respectively,  $p = 3.5 \times 10^{-7}$ ).  
43 **F)** Doubling times of control and mc-*IRA2* strains are significantly different for the wt control (n=3  
44 each,  $p = 0.00042$ ), the wt o/e *PDE2* (n=3 each,  $p = 0.00091$ ) and for the *tsalΔ* mc-*PDE2* strain (n=3,

1 p=0.0058) but not for the *tsalΔ* control strain (n=3 each, p=0.20). **G**) The time Msn2 spent in the nucleus  
2 is significantly different in the wt vector control (n=82) vs. *mc-BCY1* (n=76, p<0.001) but not *tsalΔ*  
3 vector control (n=46) vs. *mc-BCY1* (n=74, p=0.14). **H**) Relative Ras2-GTP/total Ras values in the  
4 control and *mc-IRA2* are significantly different in a two tailed t-test with unequal variance for the wt  
5 (n=3, p=0.0041). Values for the *pde2Δ* control vs *mc-IRA2* (n=3, p=0.015) and the *tsalΔ* control vs *mc-*  
6 *IRA2* (n=3, p=0.030) are significantly different in a two-tailed t-test with equal variance. **I**) cAMP levels  
7 are significantly different only between wt and *pde2Δ* strains (n=4 each, wt yEP24 vs *pde2* yEP24,  
8 p=0.0050 and wt pKF56 vs *pde2* pKF56, p=1.4 x 10<sup>-5</sup>). No significant differences were seen between  
9 wt and *tsalΔ* strains (n=4 each, wt yEP24 vs *tsalΔ* yEP24, p=0.86 and wt pKF56 vs *tsalΔ* pKF56  
10 p=0.47) or between the wt yEP24 and wt pKF56 (p=0.13).

11 **Figure 3. A.** Lifespans of the wt (n=168) vs the *tsalΔ* mutant (n=293), wt vs *tsalC48S* (n=70), wt vs  
12 *tsalC171S* (n=120), *tsalΔYF* (n=255) vs *tsalΔYFC171S* (n=70) are all different at p<0.00001. The  
13 lifespan of the *tsalΔYF* mutant is different from the wt at p<0.00854 whereas no significant difference  
14 was seen between the *tsalΔ* vs *tsalC48S* (p=0.11), *tsalC48S* vs *tsalC171S* (p=0.31), *tsalΔYFC171S*  
15 vs *tsalC171S* (p=0.23). **C.** H<sub>2</sub>O<sub>2</sub> resistance is significantly different between wt and *ras2Δ* strains  
16 (p=0.013), wt and *tsalΔ* (p=0.0049) and *tsalΔ* and *ras2Δ tsalΔ* (p=0.010). **D.** H<sub>2</sub>O<sub>2</sub> resistance is  
17 significantly different between wt control and o/e *TSAL* strains (p=0.0085), between wt o/e *TSAL* and  
18 *pde2Δ* o/e *TSAL* strains (p=0.0082) but not between *pde2Δ* control and o/e *TSAL* strains (p=0.56). **E.**  
19 H<sub>2</sub>O<sub>2</sub> resistance is significantly different between wt vector and *mc-IRA2* strains (p=0.016), wt vector  
20 and *tsalΔ* vector strains (p=0.049), *tsalΔ* vector and *mc-IRA2* strains (p=0.00056), *tsalΔ mc-IRA2* and  
21 *pde2ΔtsalΔ mc-IRA2* strains (p=0.0025) but neither the *pde2Δ* vector and *mc-IRA2* strains (p=0.40) nor  
22 *trx1Δ trx2Δ* vector and *trx1Δtrx2Δ mc-IRA2* strains (p=0.24). **F.** The scavenging rates of the wt and the  
23 *tsalΔ* mutant following the addition of 0.4 mM are not significant in a two-tailed t-test assuming equal  
24 variance (p=0.684). **G.** Fluorescence ratios 500/420 nm of the HyPer3 expressing strains are  
25 significantly different between the wt young (n=231) vs old (n=319) (p=2.42 x 10<sup>-13</sup>) and wt young vs  
26 wt young +H<sub>2</sub>O<sub>2</sub> (n=202) (p=5.27 x 10<sup>-76</sup>) but not when comparing wt old vs *tsalΔ* old  
27 (n=236)(p=0.101). **H.** Fluorescence ratios 500/420 nm of the HyPer3 expressing strains are neither  
28 significantly different between the wt young (n=404) vs the o/e *TSAL* young (n=579, p=0.069) nor the  
29 wt old (n=190) vs o/e *TSAL* old (n=204, p=0.755). **I. ????**

30 **Figure 4. C.** The abundances of all the three T241-phosphorylated peptides decreased significantly upon  
31 adding either 0.4 mM or 0.8 mM H<sub>2</sub>O<sub>2</sub> (for the C243-SH peptide p=0.05 and 0.037 respectively, for  
32 the C243-SSG peptide p=0.015 and 0.025 respectively whereas for the C243-SO<sub>3</sub>H peptide p=0.011 and  
33 0.0049, respectively. The quantity of the C243-SH T241 non-modified peptide did not change  
34 significantly upon the addition of 0.4 and 0.8 mM H<sub>2</sub>O<sub>2</sub> (p=0.20 and 0.54, respectively) whereas the  
35 C243-SSG T241 non-modified peptide increased significantly following 0.4 mM (p=0.038) but not at  
36 0.8 mM (p=0.17). **F.** Tpk1-S-SG levels are significantly different between wt with and without H<sub>2</sub>O<sub>2</sub>  
37 (p=0.012), but not between wt and *tsalΔ* without H<sub>2</sub>O<sub>2</sub> (p=0.453) or in the *tsalΔ* with and without H<sub>2</sub>O<sub>2</sub>  
38 (p=0.264).

39 **Figure 5. A.** H<sub>2</sub>O<sub>2</sub> resistance is significantly different between wt pRS313 vector control and  
40 *tpk2Δtpk3Δ* pRS313 vector control strains (p=0.030), *tpk1Δtpk2Δtpk3Δ pTPK1* and *ptpk1C243A* strains  
41 (p=0.030), *tpk1Δtpk2Δtpk3Δ pTPK1* and *ptpk1T241A* strains (p=0.0020) but not *tpk2Δtpk3Δ* pRS313  
42 and *tpk1Δtpk2Δtpk3Δ pTPK1* strains (p=1.00). **B.** H<sub>2</sub>O<sub>2</sub> resistance is significantly different between  
43 control *pTPK1* and *ptpk1C243A* strains (p=0.043), control *pTPK1* and *pTSAL pTPK1* strains (p=0.0072),  
44 *pTSAL pTPK1* and *ptpk1C243A* strains (p=0.0014) but not between control *ptpk1C243A* and *pTSAL*

1 *ptpk1C243A* strains (p=0.064). C. H<sub>2</sub>O<sub>2</sub> resistance is significantly different between *TSA1 pTPK1* and  
2 *ptpk1T241A* strains (p=0.022), *TSA1 pTPK1* and *tsalΔ pTPK1* strains (p=0.031), *tsalΔ pTPK1* and  
3 *ptpk1T241A* strains (p=0.013) but not between *TSA1* and *tsalΔ ptpk1T241A* strains (p=0.090).

4

#### 5 **Supplementary information**

6 **Figure 2 – figure supplement 1.** Tsa1 and the cytosolic thioredoxins Trx1 and Trx2 impact on PKA  
7 related growth signaling but lack of Tsa1 cannot overcome the requirement for a PKA catalytic subunit  
8 for spore viability.

9

10 **Figure 3 – figure supplement 1.** Reduced Ras activity can overcome H<sub>2</sub>O<sub>2</sub> sensitivity of cells lacking  
11 Tsa1 but not that of cell lacking the cytosolic thioredoxins Trx1 and Trx2.

12

13 **Figure 4 – figure supplement 1.** Tsa1 interacts with the PKA catalytic subunits Tpk1, controls Tpk1  
14 cysteine sulfenylation independent on disulphide formation and a significant proportion of Tpk1  
15 cysteines are glutathionylated under basal conditions.

16

17 **Figure 5 – figure supplement 1.** Substitution of Cys195, Thr241 and Cys243 by alanine in the yeast  
18 PKA catalytic subunit Tpk1 neither affects viability nor growth, whereas in silico simulation suggest  
19 that glutathionylation, but not sulfenylation, of Tpk1Cys243 significantly impacts on Tpk1 structure.

20 **Supplementary file 1.** Key resources table. Antibodies, chemicals, reagents, commercial assays,  
21 deposited data, yeast strains, oligonucleotides, recombinant DNA and software and algorithms used.

22 **Supplementary file 2.** Tpk1 mass spectrometric data.

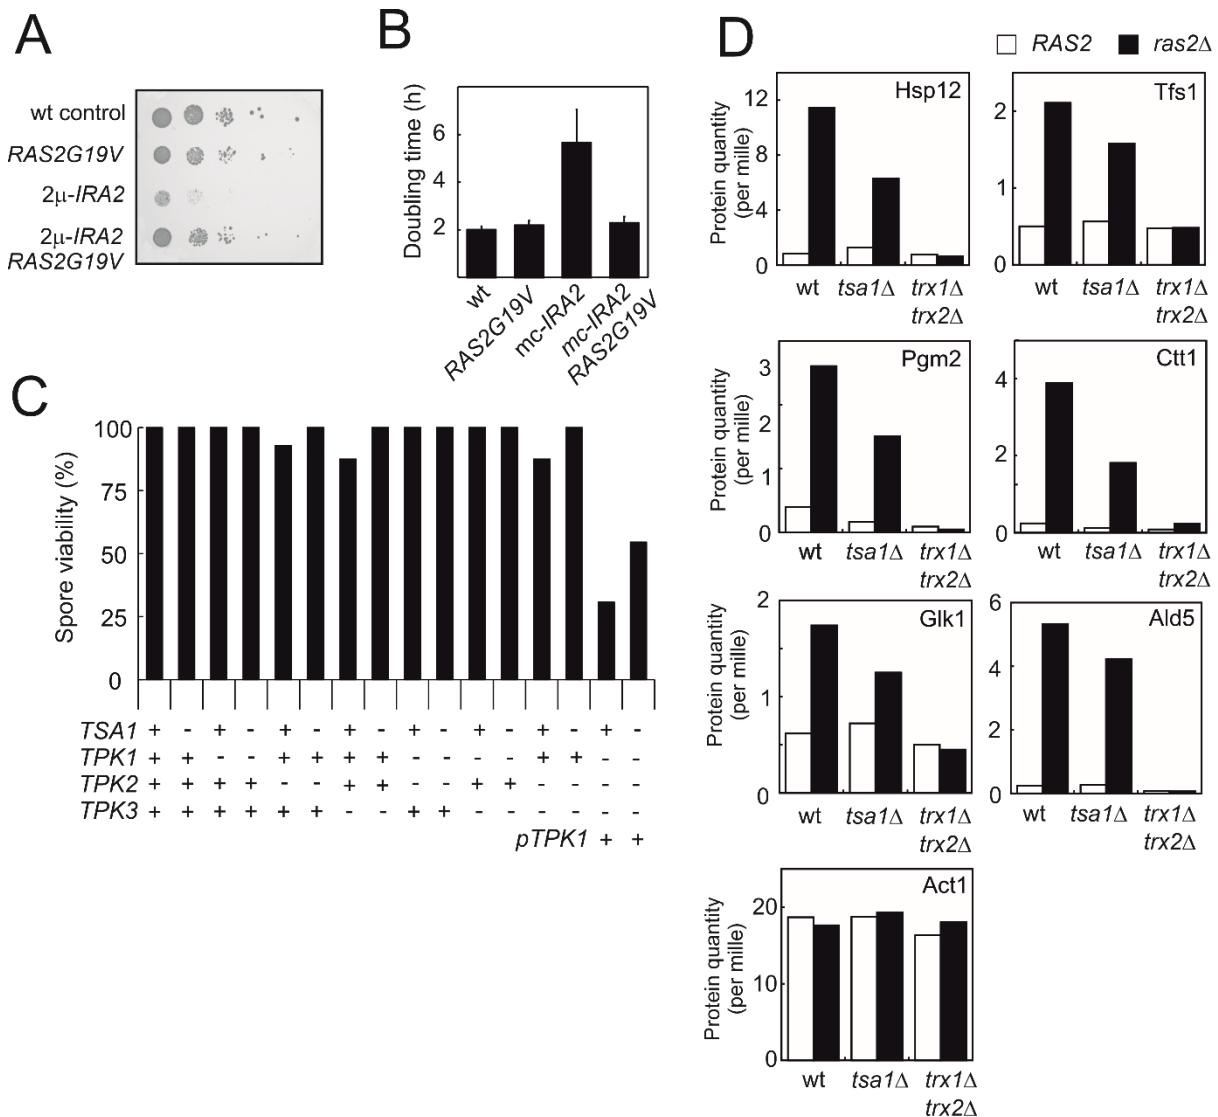

**Figure 2 – figure supplement 1.** *Tsa1* and the cytosolic thioredoxins *Trx1* and *Trx2* impact on PKA related growth signaling but lack of *Tsa1* cannot overcome the requirement for a PKA catalytic subunit for spore viability. **A-B.** Growth of cells expressing the oncogenic *RAS2G19V* allele, overexpressing *IRA2* (*mc-IRA2*) or both. **C.** Spore viability in mutants segregating in a *tsa1 $\Delta$  x *tpk1 $\Delta$ *tpk2* $\Delta$ *tpk3* $\Delta$  mutant cross. The *tpk1* $\Delta$ *tpk2* $\Delta$ *tpk3* $\Delta$  mutant was kept alive by a *Tpk1*-expressing plasmid (*pRS313-TPK1*). Spore viability was estimated in 43 tetrads where genotypes could be assigned to all spores (172 spores in total and in 8-15 spores per genotype). **D.** Expression of PKA repressed *Msn2/4* targets (Hasan et al., 2002; Molin et al., 2011) in wild-type, *tsa1 $\Delta$  or *trx1 $\Delta$ *trx2* $\Delta$  cells deficient in *RAS2* (*ras2 $\Delta$ ) or not (*RAS2*).*****



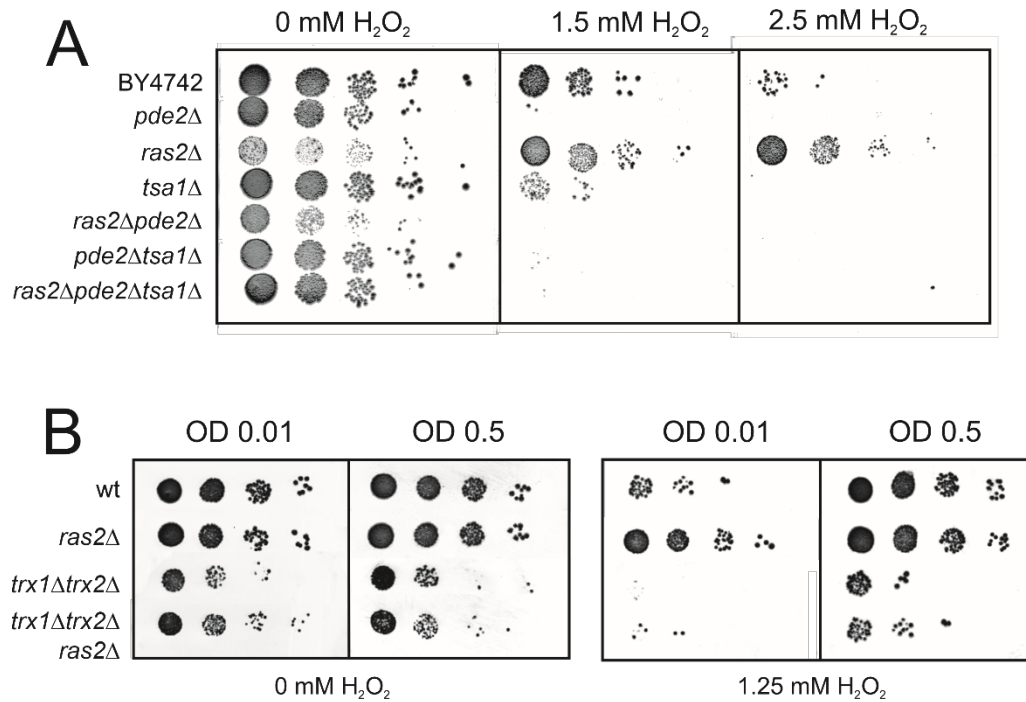

**Figure 3 – figure supplement 1.** Ras2-deficiency can overcome H<sub>2</sub>O<sub>2</sub> sensitivity of cells lacking Tsa1, but not that of cell lacking the cytosolic thioredoxins Trx1 and Trx2, by reducing PKA signaling. **A.** H<sub>2</sub>O<sub>2</sub> resistance in the indicated mutant strains strains grown to mid exponential phase (OD 0.3) and spotted onto plates with or without the indicated amounts of H<sub>2</sub>O<sub>2</sub>. **B.** H<sub>2</sub>O<sub>2</sub> resistance in the indicated mutant strains strains grown to early (OD0.01) and mid exponential phase (OD0.5) and spotted onto plates with or without the indicated amounts of H<sub>2</sub>O<sub>2</sub>.

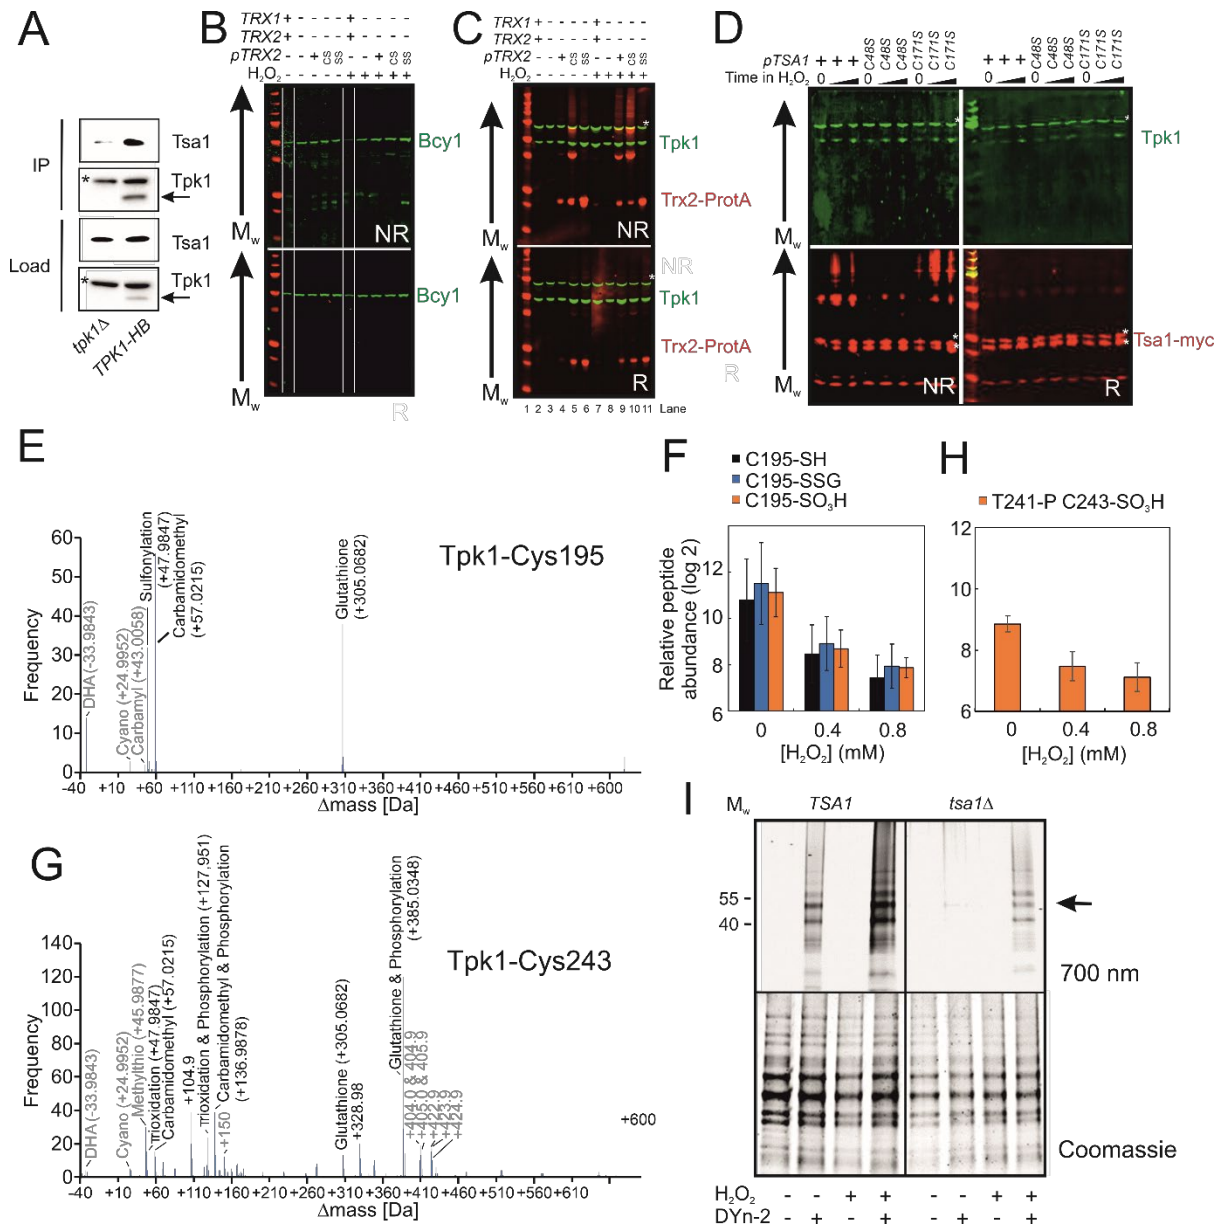

**Figure 4 – figure supplement 1.** Tsa1 interacts with the PKA catalytic subunits Tpk1, controls Tpk1 cysteine sulfenylation independent on disulphide formation and a significant proportion of Tpk1 cysteines are glutathionylated under basal conditions. **A.** Tsa1 interacts with Tpk1 in a Ni<sup>2+</sup>-sepharose coimmunoprecipitation assay (Tpk1-HB *tpk2Δtpk3Δ* strain or *tpk1Δtpk3Δ* strain used as a negative control). An arrow indicates the Tpk1 specific band, whereas \* indicates an unspecific band. **B-C)** Bcy1 (**B**) or Tpk1 (**C**) redox immunoblots of protein extracts isolated from the indicated thioredoxin mutant strains in the absence of stress (H<sub>2</sub>O<sub>2</sub> -) or following the addition of 0.4 mM H<sub>2</sub>O<sub>2</sub> for 20 min (H<sub>2</sub>O<sub>2</sub> +). NR = non-reducing R = reducing CS = *trx2C34S* SS = *trx2C31SC34S*. **D)** Tpk1 redox immunoblots of protein extracts isolated from the indicated myc-*tsa1* mutant strains in the absence of stress (Time in H<sub>2</sub>O<sub>2</sub> = 0) or 10 or 120 min following the addition of 0.4 mM H<sub>2</sub>O<sub>2</sub>. **E, G)** Mass-shifts in peptides covering the indicated Tpk1 cysteines detected using unbiased open search approaches. Tpk1-Cys195 denotes the F189-K204 peptide whereas Tpk1-Cys243 the Y239-K261 peptide. **F)** PRM-based quantification of the indicated C195 containing Tpk1 peptides (n=3). Error bars indicate SD. **H)** PRM-based quantification of the Thr241 phosphorylated and Cys243 sulfenic acid containing Y239-K261 peptide in Tpk1 (n=3). Error bars indicate SD. **I)** DYn-2 sulfenylation assay depicting oxidation of Tpk1 following the addition of 0.5 mM of H<sub>2</sub>O<sub>2</sub> for 5 min or not in the presence and

absence of *TSA1*. Tpk1-HB was immunoprecipitated from *tpk2Δtpk3Δ (TSA1)* and *tpk2Δtpk3Δ tpk2Δtsa1Δ (tsa1Δ)* cells and analyzed in gel for cyanine5 fluorescence. Arrows indicate Tpk1. Coomassie staining was used to assess total protein used in the assay.



### Supplementary File 1. Key resources table

| REAGENT or RESOURCE                                                                    | SOURCE                             | IDENTIFIER                   |
|----------------------------------------------------------------------------------------|------------------------------------|------------------------------|
| <b><u>Antibodies</u></b>                                                               |                                    |                              |
| Mouse monoclonal anti-Tpk1                                                             | Santa Cruz Biotechnology           | Sc-374592, RRID: AB_10990730 |
| Goat polyclonal anti-Bcy1                                                              | Santa Cruz Biotechnology           | Sc-6734, RRID: AB_671758     |
| Rabbit IgG (anti-ProtA)                                                                | Sigma Aldrich                      | I5006, RRID: AB_1163659      |
| Goat polyclonal anti-Ras2                                                              | Santa Cruz Biotechnology           | Sc-6759, RRID: AB_672465     |
| Mouse monoclonal anti-Glutathione [D8]                                                 | Abcam                              | ab19534, RRID: AB_880243     |
| Mouse monoclonal anti-Pgk1 [22C5D8]                                                    | Thermo Fisher                      | 459250, RRID: AB_2532235     |
| Mouse monoclonal anti-2 Cys Prx [6E5] (anti-Tsa1)                                      | Abcam                              | ab16765, RRID: AB_443456     |
| <b><u>Bacterial and Virus Strains</u></b>                                              |                                    |                              |
| <i>E. coli</i> BL21 strain expressing pGEX2T-1-GST-RBD                                 | This study, (Peeters et al., 2017) |                              |
| <b><u>Chemicals, Peptides, and Recombinant Proteins</u></b>                            |                                    |                              |
| G418                                                                                   | Acros Organics                     | Cat #: 329400050             |
| ClonNAT                                                                                | Werner Bioagents                   | Cat #: 5.005.000             |
| Hygromycin B                                                                           | Formedium                          | Cat #: HYG5000               |
| Phleomycin                                                                             | Sigma Aldrich                      | P9564                        |
| 5-fluoroorotic acid                                                                    | Sigma Aldrich                      | F5013                        |
| EZ-Link Sulfo-NHS-LC Biotin                                                            | Thermo Fisher                      | Cat #: 21335                 |
| Trichloroacetic acid                                                                   | Sigma Aldrich                      | Cat #: T6399                 |
| KSCN                                                                                   | Sigma Aldrich                      | Cat #: P2713                 |
| (NH <sub>4</sub> ) <sub>2</sub> Fe(SO <sub>4</sub> ) <sub>2</sub> • 6 H <sub>2</sub> O | Sigma Aldrich                      | Cat #: 215406                |
| TRIzol Reagent                                                                         | Thermo Fisher                      | Cat #: 15596026              |
| DNase, RNase-free set                                                                  | Qiagen                             | Cat #: 79254                 |
| cOmplete Mini EDTA-free protease inhibitor                                             | Roche Applied Science              | Cat #: 11873580001           |

|                                                         |                                    |                                                                                               |
|---------------------------------------------------------|------------------------------------|-----------------------------------------------------------------------------------------------|
| Glutathione-S-Transferase-Raf1-Binding-Domain (GST-RBD) | This study, (Peeters et al., 2017) |                                                                                               |
| Glutathione Sepharose beads                             |                                    |                                                                                               |
| 12% Bis-Tris NUPAGE gels                                | Thermo Fisher                      | Cat #: NP0349BOX                                                                              |
| MOPS running buffer                                     | Thermo Fisher                      | Cat #: NP0001                                                                                 |
| Immobilon-FL PVDF membrane                              | Millipore                          | Cat #: IPFL00010                                                                              |
| Ni <sup>2+</sup> -Sepharose beads                       | GE Healthcare                      | Cat #: 17-5318-06                                                                             |
| Anti-c-myc, agarose conjugated                          | Sigma-Aldrich                      | Cat #: A7470                                                                                  |
| Trypsin Gold, mass spectrometry grade                   | Promega                            | Cat #: V5280                                                                                  |
| N-ethylmaleimide                                        | Sigma-Aldrich                      | Cat #: E3876                                                                                  |
| DYn-2                                                   | Cayman Chemical                    | Cat #: 11220                                                                                  |
| 10% Criterion TGX Precast Midi Protein Gel              | Bio-Rad                            | Cat #: 5671034                                                                                |
| Peptide Retention Time Calibration Mixture              | Pierce, Thermo Fisher              | Cat #: 88320                                                                                  |
| <b><u>Critical Commercial Assays</u></b>                |                                    |                                                                                               |
| PureLink RNA Mini kit                                   | Thermo-Fisher                      | Cat #: 12183025                                                                               |
| QuantiTect Reverse Transcription Kit                    | Qiagen                             | Cat #: 205313                                                                                 |
| iQ SYBR Green Supermix                                  | BioRad                             | Cat #: 170-8882                                                                               |
| LANCE cAMP 384 kit                                      | Perkin Elmer                       | Cat #: AD0262                                                                                 |
| <b><u>Deposited Data</u></b>                            |                                    |                                                                                               |
| Tpk1 MS-data                                            | PRIDE                              | PXD012617                                                                                     |
| <b><u>Yeast strains used</u></b>                        |                                    |                                                                                               |
| YMM130, wt control                                      | (Hanzen et al., 2016)              | MAT <b>alpha</b><br><i>his3Δ1::pRS403,</i><br><i>leu2Δ0 lys2Δ0 ura3Δ0</i>                     |
| <i>o/e TSA1</i>                                         | (Hanzen et al., 2016)              | MAT <b>alpha</b><br><i>his3Δ1::pRS403-Myc-</i><br><i>TSA1, leu2Δ0 lys2Δ0</i><br><i>ura3Δ0</i> |

|                                      |                                              |                                                                                                          |
|--------------------------------------|----------------------------------------------|----------------------------------------------------------------------------------------------------------|
| YMM175, <i>pde2Δ</i> control         | This study                                   | MAT <b>alpha</b><br><i>his3ΔI::pRS403</i> ,<br><i>leu2Δ0 lys2Δ0 ura3Δ0</i><br><i>pde2Δ::kanMX4</i>       |
| YMM176, <i>pde2Δ</i> o/e <i>TSA1</i> | This study                                   | MAT <b>alpha</b><br><i>his3ΔI::pRS403-Myc-TSA1</i> , <i>leu2Δ0 lys2Δ0 ura3Δ0</i><br><i>pde2Δ::kanMX4</i> |
| BY4742, wt                           | (Brachmann et al., 1998)                     | MAT <b>alpha</b> <i>his3ΔI</i><br><i>leu2Δ0 lys2Δ0 ura3Δ0</i>                                            |
| YMM114, <i>tsa1Δ</i>                 | (Molin et al., 2011)                         | BY4742<br><i>tsa1Δ::natMX4</i>                                                                           |
| YMM113, <i>ras2Δ</i>                 | (Molin et al., 2011)                         | BY4742<br><i>ras2Δ::kanMX4</i>                                                                           |
| YMM170, <i>ras2Δtsa1Δ</i>            | This study                                   | BY4742<br><i>ras2Δ::kanMX4</i><br><i>tsa1Δ::natMX4</i>                                                   |
| BY4742, <i>pde2Δ</i>                 | Research Genetics,<br>(Giaever et al., 2002) | BY4742<br><i>pde2Δ::kanMX4</i>                                                                           |
| YMM171, <i>ras2Δpde2Δ</i>            | This study                                   | BY4742<br><i>ras2Δ::kanMX4</i><br><i>pde2Δ::hphMX4</i>                                                   |
| YMM172, <i>pde2Δtsa1Δ</i>            | This study                                   | BY4742<br><i>pde2Δ::kanMX4</i><br><i>tsa1Δ::natMX4</i>                                                   |
| YMM173, <i>ras2Δpde2Δtsa1Δ</i>       | This study                                   | BY4742<br><i>ras2Δ::kanMX4</i><br><i>pde2Δ::hphMX4</i><br><i>tsa1Δ::natMX4</i>                           |
| YMM145, <i>tsa1C48S</i>              | (Bodvard et al., 2017)                       | BY4742 <i>tsa1C48S</i>                                                                                   |
| YMM146, <i>tsa1C171S</i>             | (Bodvard et al., 2017)                       | BY4742 <i>tsa1C171S</i>                                                                                  |
| YMM147, <i>tsa1ΔYF</i>               | (Bodvard et al., 2017)                       | BY4742 <i>tsa1(1-184)</i>                                                                                |
| YMM148, <i>tsa1C171SΔYF</i>          | (Bodvard et al., 2017)                       | BY4742 <i>tsa1(1-184)C171S</i>                                                                           |

|                                                         |                        |                                                                                                                                            |
|---------------------------------------------------------|------------------------|--------------------------------------------------------------------------------------------------------------------------------------------|
| YMM143, <i>trx1Δtrx2Δ</i>                               | (Bodvard et al., 2017) | BY4742<br><i>trx1Δ::hphMX4</i><br><i>trx2Δ::natMX4</i>                                                                                     |
| YMM174, <i>msn2Δmsn4Δ</i>                               | This study             | BY4742<br><i>msn2Δ::hphMX4</i><br><i>msn4Δ::natMX4</i>                                                                                     |
| YMM177                                                  | This study             | <b>MAT a</b> , <i>his3Δ1</i><br><i>leu2Δ0 lys2Δ0 ura3Δ0</i><br><i>ras1Δ::hphMX4</i>                                                        |
| YMM178                                                  | This study             | BY-2n<br><i>met15Δ0/MET15</i><br><i>lys2Δ0/LYS2</i><br><i>tpk1Δ::kanMX4/TPK1</i><br><i>tpk2Δ::natMX4/TPK2</i><br><i>tpk3Δ::hphMX4/TPK3</i> |
| YMM179, <i>tpk1Δtpk3Δ</i>                               | This study             | BY4742<br><i>tpk1Δ::kanMX4</i><br><i>tpk3Δ::hphMX4</i>                                                                                     |
| YMM180, <i>tpk2Δtpk3Δ</i>                               | This study             | BY4742<br><i>tpk2Δ::natMX4</i><br><i>tpk3Δ::hphMX4</i>                                                                                     |
| YMM181, <i>tpk1Δtpk2Δtpk3Δ pTPK1-URA</i>                | This study             | BY4742<br><i>tpk1Δ::kanMX4</i><br><i>tpk2Δ::natMX4</i><br><i>tpk3Δ::hphMX4</i><br><i>pRS316-TPK1</i>                                       |
| YMM182, <i>tpk1Δtpk2Δtpk3Δ pTPK1-URA vector control</i> | This study             | BY4742<br><i>tpk1Δ::kanMX4</i><br><i>tpk2Δ::natMX4</i><br><i>tpk3Δ::hphMX4</i><br><i>pRS313 pTPK1-URA3</i>                                 |
| YMM183, <i>tpk1Δtpk2Δtpk3Δ pTPK1-URA pTPK1</i>          | This study             | BY4742<br><i>tpk1Δ::kanMX4</i><br><i>tpk2Δ::natMX4</i><br><i>tpk3Δ::hphMX4</i><br><i>pRS313-TPK1 pTPK1-URA3</i>                            |
| YMM184, <i>tpk1Δtpk2Δtpk3Δ pTPK1-URA3 ptpk1C243A</i>    | This study             | BY4742<br><i>tpk1Δ::kanMX4</i><br><i>tpk2Δ::natMX4</i><br><i>tpk3Δ::hphMX4</i><br><i>pRS313-tpk1C243A</i><br><i>pTPK1-URA3</i>             |



|                                                         |            |                                                                                                                                   |
|---------------------------------------------------------|------------|-----------------------------------------------------------------------------------------------------------------------------------|
| YMM185, <i>tpk1 Δtpk2 Δtpk3 Δ pTPK1-URA3 ptpk1C243D</i> | This study | BY4742<br><i>tpk1 Δ::kanMX4</i><br><i>tpk2 Δ::natMX4</i><br><i>tpk3 Δ::hphMX4</i><br><i>pRS313-tpk1C243D</i><br><i>pTPK1-URA3</i> |
| YMM186, <i>tpk1 Δtpk2 Δtpk3 Δ pTPK1-URA3 ptpk1T241A</i> | This study | BY4742<br><i>tpk1 Δ::kanMX4</i><br><i>tpk2 Δ::natMX4</i><br><i>tpk3 Δ::hphMX4</i><br><i>pRS313-tpk1T241A</i><br><i>pTPK1-URA3</i> |
| YMM187, <i>tpk1 Δtpk2 Δtpk3 Δ pTPK1</i>                 | This study | BY4742<br><i>tpk1 Δ::kanMX4</i><br><i>tpk2 Δ::natMX4</i><br><i>tpk3 Δ::hphMX4</i><br><i>pRS313-TPK1</i>                           |
| YMM188, <i>tpk1 Δtpk2 Δtpk3 Δ ptpk1C243A</i>            | This study | BY4742<br><i>tpk1 Δ::kanMX4</i><br><i>tpk2 Δ::natMX4</i><br><i>tpk3 Δ::hphMX4</i><br><i>pRS313-tpk1C243A</i>                      |
| YMM189, <i>tpk1 Δtpk2 Δtpk3 Δ ptpk1C243D</i>            | This study | BY4742<br><i>tpk1 Δ::kanMX4</i><br><i>tpk2 Δ::natMX4</i><br><i>tpk3 Δ::hphMX4</i><br><i>pRS313-tpk1C243D</i>                      |
| YMM190, <i>tpk1 Δtpk2 Δtpk3 Δ ptpk1T241A</i>            | This study | BY4742<br><i>tpk1 Δ::kanMX4</i><br><i>tpk2 Δ::natMX4</i><br><i>tpk3 Δ::hphMX4</i><br><i>pRS313-tpk1T241A</i>                      |
| YMM191, <i>ras2 Δtrx1 Δtrx2 Δ</i>                       | This study | BY4742<br><i>ras2 Δ::kanMX4</i><br><i>trx1 Δ::hphMX4</i><br><i>trx2 Δ::natMX4</i>                                                 |
| YMM192                                                  | This study | BY4741<br><i>tsa1 Δ::bleMX4</i>                                                                                                   |
| YMM193, <i>tpk2 Δtpk3 Δtsa1 Δ</i>                       | This study | BY4741<br><i>tpk2 Δ::natMX4</i><br><i>tpk3 Δ::hphMX4</i><br><i>tsa1 Δ::bleMX4</i>                                                 |

|                                                              |            |                                                                                                                                                                                     |
|--------------------------------------------------------------|------------|-------------------------------------------------------------------------------------------------------------------------------------------------------------------------------------|
| WR1832, <i>TPK1-HBH tpk2Δtpk3Δ</i>                           | This study | BY4742 <i>TPK1-HBH::TRP1</i><br><i>tpk2Δ::natMX4</i><br><i>tpk3Δ::hphMX4</i><br><i>trp1Δ::kanMX4</i>                                                                                |
| yCP101, <i>tpk1Δtpk2Δtpk3Δ pTPK1-URA vector control</i>      | This study | MAT <b>a</b><br><i>his3ΔI::pRS403</i> ,<br><i>leu2Δ0 lys2Δ0 ura3Δ0</i><br><i>tpk1Δ::kanMX4</i><br><i>tpk2Δ::natMX4</i><br><i>tpk3Δ::hphMX4</i><br><i>pRS316-TPK1</i>                |
| yCP102, <i>tpk1Δtpk2Δtpk3Δ ptpk1C243A-URA vector control</i> | This study | MAT <b>alpha</b><br><i>his3ΔI::pRS403</i> ,<br><i>leu2Δ0 lys2Δ0 ura3Δ0</i><br><i>tpk1Δ::kanMX4</i><br><i>tpk2Δ::natMX4</i><br><i>tpk3Δ::hphMX4</i><br><i>pRS316-tpk1C243A</i>       |
| yCP103, <i>tpk1Δtpk2Δtpk3Δ pTPK1-URA o/e TSA1</i>            | This study | MAT <b>alpha</b><br><i>his3ΔI::pRS403-myc-TSA1</i> , <i>leu2Δ0 lys2Δ0 ura3Δ0</i><br><i>tpk1Δ::kanMX4</i><br><i>tpk2Δ::natMX4</i><br><i>tpk3Δ::hphMX4</i><br><i>pRS316-TPK1</i>      |
| yCP104, <i>tpk1Δtpk2Δtpk3Δ ptpk1C243A-URA o/e TSA1</i>       | This study | MAT <b>alpha</b><br><i>his3ΔI::pRS403-myc-TSA1</i> , <i>leu2Δ0 lys2Δ0 ura3Δ0</i><br><i>tpk1Δ::kanMX4</i><br><i>tpk2Δ::natMX4</i><br><i>tpk3Δ::hphMX4</i><br><i>pRS316-tpk1C243A</i> |
| yCP105, <i>tpk1Δtpk2Δtpk3Δtsa1Δ pTPK1</i>                    | This study | BY4742<br><i>tpk1Δ::kanMX4</i><br><i>tpk2Δ::natMX4</i><br><i>tpk3Δ::hphMX4</i><br><i>tsa1Δ::bleMX4</i><br><i>pRS313-TPK1</i>                                                        |

|                                               |            |                                                                                                                                   |
|-----------------------------------------------|------------|-----------------------------------------------------------------------------------------------------------------------------------|
| yCP106, <i>tpk1Δtpk2Δtpk3Δtsa1Δptpk1T241A</i> | This study | BY4742<br><i>tpk1Δ::kanMX4</i><br><i>tpk2Δ::natMX4</i><br><i>tpk3Δ::hphMX4</i><br><i>tsa1Δ::bleMX4</i><br><i>pRS313-tpk1T241A</i> |
| yCP107, <i>TPK1-HBH tpk2Δtpk3Δtsa1Δ</i>       | This study | BY4742 <i>TPK1-HBH::TRP1</i><br><i>tpk2Δ::natMX4</i><br><i>tpk3Δ::hphMX4</i><br><i>trp1Δ::kanMX4</i><br><i>tsa1Δ::bleMX4</i>      |

### Oligonucleotides

|               |                          |                                                        |
|---------------|--------------------------|--------------------------------------------------------|
| <i>ACTIF</i>  | (Caballero et al., 2011) | For Q-PCR of <i>ACT1</i><br>CTGCCGGTATTG<br>ACCAAAC    |
| <i>ACTIR</i>  | (Caballero et al., 2011) | For Q-PCR of <i>ACT1</i><br>CGGTGAATTTCC<br>TTTTGCATT  |
| <i>CTTIF</i>  | This study               | For Q-PCR of <i>CTT1</i><br>GCTTCTCAATAC<br>TCAAGACCAG |
| <i>CTTIR</i>  | This study               | For Q-PCR of <i>CTT1</i><br>GCGGCGTATGTA<br>ATATCACTC  |
| <i>HSP12F</i> | (Caballero et al., 2011) | For Q-PCR of <i>HSP12</i><br>AGGTCGCTGGTA<br>AGGTTC    |
| <i>HSP12R</i> | (Caballero et al., 2011) | For Q-PCR of <i>HSP12</i><br>ATCGTTCAACTT<br>GGACTTGG  |

### Recombinant DNA

|        |                                                        |                                    |
|--------|--------------------------------------------------------|------------------------------------|
| yEP24  | (Botstein et al., 1979)                                | yeast 2 $\mu$ , <i>URA3</i> vector |
| pKF56  | (Tanaka et al., 1990)                                  | <i>IRA2</i> in yEP24               |
| pRS425 | (Christianson, Sikorski, Dante, Shero, & Hieter, 1992) | yeast 2 $\mu$ , <i>LEU2</i> vector |

|                                                |                                                |                                                                                   |
|------------------------------------------------|------------------------------------------------|-----------------------------------------------------------------------------------|
| yEP13- <i>PDE2</i>                             | (Hlavata, Aguilaniu, Pichova, & Nystrom, 2003) | <i>PDE2</i> in yeast 2 $\mu$ , <i>LEU2</i> plasmid                                |
| yEPlac195                                      | (Gietz & Sugino, 1988)                         | yeast 2 $\mu$ , <i>URA3</i> vector                                                |
| pXP1                                           | (Pan & Heitman, 1999)                          | <i>BCY1</i> in yEPlac195                                                          |
| pRS315                                         | (Sikorski & Hieter, 1989)                      | yeast CEN/ARS, <i>LEU2</i> empty vector                                           |
| B561 (pRS315- <i>RAS2G19V</i> )                | (Bartels, Mitchell, Dong, & Deschenes, 1999)   | <i>RAS2G19V</i> in pRS315                                                         |
| pHyPer3C199S (pRS416- <i>GPD-HyPer3C199S</i> ) | This study, (Bilan et al., 2013)               | HyPer3C199S                                                                       |
| pRS416- <i>GPD-AKAR4</i>                       | (Molin et al., 2020)                           | <i>AKAR4</i> in pRS416- <i>GPD</i> [CEN/ARS, p <i>GPD</i> promotor, <i>URA3</i> ] |
| pRS316                                         | (Sikorski & Hieter, 1989)                      | yeast CEN/ARS, <i>URA3</i> empty vector                                           |
| pRS316- <i>myc-TSA1</i>                        | (Biteau, Labarre, & Toledano, 2003)            | <i>Myc-TSA1</i> in pRS316                                                         |
| pRS316- <i>myc-tsa1C48S</i>                    | (Molin et al., 2011)                           | <i>Myc-tsa1C48S</i> in pRS316                                                     |
| pRS316- <i>myc-tsa1C171S</i>                   | (Molin et al., 2011)                           | <i>Myc-tsa1C171S</i> in pRS316                                                    |
| pRS315- <i>ProtA</i>                           | This study                                     | <i>ProteinA</i> in pRS315                                                         |
| pRS315- <i>TRX2-ProteinA</i>                   | (Bodvard et al., 2017)                         | <i>TRX2-ProteinA</i> in pRS315                                                    |
| pRS315- <i>trx2C34S-ProteinA</i>               | This study                                     | <i>trx2C34S-ProteinA</i> in pRS315                                                |
| pRS315- <i>trx2C31SC34S-ProteinA</i>           | This study                                     | <i>trx2C31SC34S-ProteinA</i> in pRS315                                            |
| pRS313                                         | (Sikorski & Hieter, 1989)                      | yeast CEN/ARS, <i>HIS3</i> empty vector                                           |
| pRS313- <i>TPK1</i>                            | (Voordeckers et al., 2011)                     | <i>TPK1</i> in pRS313                                                             |
| pRS313- <i>tpk1C243A</i>                       | This study                                     | <i>tpk1C243A</i> in pRS313                                                        |
| pRS313- <i>tpk1C243D</i>                       | This study                                     | <i>tpk1C243D</i> in pRS313                                                        |
| pRS313- <i>tpk1T241A</i>                       | This study                                     | <i>tpk1T241A</i> in pRS313                                                        |
| p <i>TPK1-URA3</i> (pRS316- <i>TPK1</i> )      | Karin Voordeckers                              | <i>TPK1</i> in pRS316                                                             |

|                                       |                                               |                            |
|---------------------------------------|-----------------------------------------------|----------------------------|
| <i>tpk1C243A-URA3</i>                 | This study                                    | <i>tpk1C243A</i> in pRS316 |
| <b><u>Software and Algorithms</u></b> |                                               |                            |
| MATLAB                                | Mathworks                                     | version 2016b              |
| CellX                                 | (Mayer, Dimopoulos, Rudolf, & Stelling, 2013) |                            |
| Schrödinger Suite                     | Schrödinger LLC                               |                            |
| GROMACS                               | (Abraham et al., 2015)                        |                            |
| Amber tools                           | (Salomon-Ferrer, Case, & Walker, 2013)        |                            |

### Supplementary file 1 references

- Abraham, M. J., Murtola, T., Schultz, R., Pall, S., Smith, J. C., Hess, B., & Lindahl, E. (2015). GROMACS: High performance molecular simulations through multi-level parallelism from laptops to supercomputers. *SoftwareX*, *54*(7), 1932-1940.
- Bartels, D. J., Mitchell, D. A., Dong, X., & Deschenes, R. J. (1999). Erf2, a novel gene product that affects the localization and palmitoylation of Ras2 in *Saccharomyces cerevisiae*. *Mol Cell Biol*, *19*(10), 6775-6787.
- Bilan, D. S., Pase, L., Joosen, L., Gorokhovatsky, A. Y., Ermakova, Y. G., Gadella, T. W. J., . . . Belousov, V. V. (2013). HyPer-3: A Genetically Encoded H<sub>2</sub>O<sub>2</sub> Probe with Improved Performance for Ratiometric and Fluorescence Lifetime Imaging. *ACS chemical biology*, *8*(3), 535-542. doi:10.1021/cb300625g
- Biteau, B., Labarre, J., & Toledano, M. B. (2003). ATP-dependent reduction of cysteine-sulphinic acid by *S. cerevisiae* sulphiredoxin. *Nature*, *425*(6961), 980-984.
- Bodvard, K., Peeters, K., Roger, F., Romanov, N., Igbaria, A., Toledano, M. B., . . . Molin, M. (2017). Light-sensing via hydrogen peroxide and a peroxiredoxin. *Nat Commun*, *8*, 14791. doi:10.1038/ncomms14791
- Botstein, D., Falco, S. C., Stewart, S. E., Brennan, M., Scherer, S., Stinchcomb, D. T., . . . Davis, R. W. (1979). Sterile host yeasts (SHY): a eukaryotic system of biological containment for recombinant DNA experiments. *Gene*, *8*(1), 17-24.
- Brachmann, C. B., Davies, A., Cost, G. J., Caputo, E., Li, J., Hieter, P., & Boeke, J. D. (1998). Designer deletion strains derived from *Saccharomyces cerevisiae* S288C: a useful set of strains and plasmids for PCR-mediated gene disruption and other applications. *Yeast*, *14*(2), 115-132.
- Caballero, A., Ugidos, A., Liu, B., Oling, D., Kvint, K., Hao, X., . . . Nystrom, T. (2011). Absence of mitochondrial translation control proteins extends life span by activating sirtuin-dependent silencing. *Molecular cell*, *42*(3), 390-400. doi:10.1016/j.molcel.2011.03.021
- Christianson, T. W., Sikorski, R. S., Dante, M., Shero, J. H., & Hieter, P. (1992). Multifunctional yeast high-copy-number shuttle vectors. *Gene*, *110*(1), 119-122. doi:0378-1119(92)90454-W [pii]
- Giaever, G., Chu, A. M., Ni, L., Connelly, C., Riles, L., Veronneau, S., . . . Johnston, M. (2002). Functional profiling of the *Saccharomyces cerevisiae* genome. *Nature*, *418*(6896), 387-391.
- Gietz, R. D., & Sugino, A. (1988). New yeast-*Escherichia coli* shuttle vectors constructed with in vitro mutagenized yeast genes lacking six-base pair restriction sites. *Gene*, *74*(2), 527-534.

- Hanzen, S., Vielfort, K., Yang, J., Roger, F., Andersson, V., Zamarbide-Fores, S., . . . Nystrom, T. (2016). Lifespan Control by Redox-Dependent Recruitment of Chaperones to Misfolded Proteins. *Cell*, *166*(1), 140-151. doi:10.1016/j.cell.2016.05.006
- Hlavata, L., Aguilaniu, H., Pichova, A., & Nystrom, T. (2003). The oncogenic RAS2(val19) mutation locks respiration, independently of PKA, in a mode prone to generate ROS. *Embo J*, *22*(13), 3337-3345. doi:10.1093/emboj/cdg314
- Mayer, C., Dimopoulos, S., Rudolf, F., & Stelling, J. (2013). Using CellX to Quantify Intracellular Events. *101*(1), 14.22.11-14.22.20. doi:doi:10.1002/0471142727.mb1422s101
- Molin, M., Logg, K., Bodvard, K., Peeters, K., Forsmark, A., Roger, F., . . . Blomberg, A. (2020). cAMP-dependent protein kinase controls the multifaceted biology of visible light. *BMC Biology*, under review.
- Molin, M., Yang, J., Hanzen, S., Toledano, M. B., Labarre, J., & Nystrom, T. (2011). Life span extension and H<sub>2</sub>O<sub>2</sub>-resistance elicited by caloric restriction require the peroxiredoxin Tsa1 in *Saccharomyces cerevisiae*. *Mol Cell*, *43*(5), 823-833. doi:10.1016/j.molcel.2011.07.027
- Pan, X., & Heitman, J. (1999). Cyclic AMP-dependent protein kinase regulates pseudohyphal differentiation in *Saccharomyces cerevisiae*. *Mol Cell Biol*, *19*(7), 4874-4887.
- Peeters, K., Van Leemputte, F., Fischer, B., Bonini, B. M., Quezada, H., Tsytlonok, M., . . . Thevelein, J. M. (2017). Fructose-1,6-bisphosphate couples glycolytic flux to activation of Ras. *Nat Commun*, *8*(1), 922. doi:10.1038/s41467-017-01019-z
- Salomon-Ferrer, R., Case, D. A., & Walker, R. C. (2013). An overview of the Amber biomolecular simulation package. *Wiley Interdisciplinary Reviews-Computational Molecular Science*, *3*(2), 198-210. doi:10.1002/wcms.1121
- Sikorski, R. S., & Hieter, P. (1989). A system of shuttle vectors and yeast host strains designed for efficient manipulation of DNA in *Saccharomyces cerevisiae*. *Genetics*, *122*(1), 19-27.
- Tanaka, K., Nakafuku, M., Tamanoi, F., Kaziro, Y., Matsumoto, K., & Toh-e, A. (1990). IRA2, a second gene of *Saccharomyces cerevisiae* that encodes a protein with a domain homologous to mammalian ras GTPase-activating protein. *Mol Cell Biol*, *10*(8), 4303-4313.
- Voordeckers, K., Kimpe, M., Haesendonckx, S., Louwet, W., Versele, M., & Thevelein, J. M. (2011). Yeast 3-phosphoinositide-dependent protein kinase-1 (PDK1) orthologs Pkh1-3 differentially regulate phosphorylation of protein kinase A (PKA) and the protein kinase B (PKB)/S6K ortholog Sch9. *J Biol Chem*, *286*(25), 22017-22027. doi:10.1074/jbc.M110.200071
